# Supplementary material for: Innovative models of care for the health facility of the future: a protocol for a mixed-methods study to elicit consumer and provider views
Source: PubMed Central journal article supplement — BMJ Open. 2022 Nov 15;12(11):e059330. doi: 10.1136/bmjopen-2021-059330 (PMC9670088; doi:10.1136/bmjopen-2021-059330), 2022-11-15
Supplement: bmjopen-2021-059330.draft_revisions.pdf [file bmjopen-2021-059330.draft_revisions.pdf]

# BMJ Open

BMJ Open is committed to open peer review. As part of this commitment we make the peer review history of every article we publish publicly available.

When an article is published we post the peer reviewers' comments and the authors' responses online. We also post the versions of the paper that were used during peer review. These are the versions that the peer review comments apply to.

The versions of the paper that follow are the versions that were submitted during the peer review process. They are not the versions of record or the final published versions. They should not be cited or distributed as the published version of this manuscript.

BMJ Open is an open access journal and the full, final, typeset and author-corrected version of record of the manuscript is available on our site with no access controls, subscription charges or pay-per-view fees (<http://bmjopen.bmj.com>).

If you have any questions on BMJ Open's open peer review process please email [info.bmjopen@bmj.com](mailto:info.bmjopen@bmj.com)

# BMJ Open

## Innovative models of care for the health facility of the future: a protocol for a mixed-methods study to elicit consumer and provider views

|                               |                                                                                                                                                                                                                                                                                                                                                                                                                                                                                                                                                                                                                                                                                                                                                                                                                                                                                                                                                                                                                                                                                                                                                                                                                                                                                                                                                                                                    |
|-------------------------------|----------------------------------------------------------------------------------------------------------------------------------------------------------------------------------------------------------------------------------------------------------------------------------------------------------------------------------------------------------------------------------------------------------------------------------------------------------------------------------------------------------------------------------------------------------------------------------------------------------------------------------------------------------------------------------------------------------------------------------------------------------------------------------------------------------------------------------------------------------------------------------------------------------------------------------------------------------------------------------------------------------------------------------------------------------------------------------------------------------------------------------------------------------------------------------------------------------------------------------------------------------------------------------------------------------------------------------------------------------------------------------------------------|
| Journal:                      | <i>BMJ Open</i>                                                                                                                                                                                                                                                                                                                                                                                                                                                                                                                                                                                                                                                                                                                                                                                                                                                                                                                                                                                                                                                                                                                                                                                                                                                                                                                                                                                    |
| Manuscript ID                 | bmjopen-2021-059330                                                                                                                                                                                                                                                                                                                                                                                                                                                                                                                                                                                                                                                                                                                                                                                                                                                                                                                                                                                                                                                                                                                                                                                                                                                                                                                                                                                |
| Article Type:                 | Protocol                                                                                                                                                                                                                                                                                                                                                                                                                                                                                                                                                                                                                                                                                                                                                                                                                                                                                                                                                                                                                                                                                                                                                                                                                                                                                                                                                                                           |
| Date Submitted by the Author: | 07-Feb-2022                                                                                                                                                                                                                                                                                                                                                                                                                                                                                                                                                                                                                                                                                                                                                                                                                                                                                                                                                                                                                                                                                                                                                                                                                                                                                                                                                                                        |
| Complete List of Authors:     | <p>Carrigan, Ann; Macquarie University, Australian Institute of Health Innovation<br/>         Roberts, Natalie; Macquarie University<br/>         Clay-Williams, Robyn; Macquarie University<br/>         Hibbert, Peter; Macquarie University<br/>         Pomare, Chiara; Macquarie University, Australian Institute of Health Innovation, Centre for Healthcare Resilience and Implementation Science<br/>         Mahmoud, Zeyad; Australian Institute of Health Innovation, Faculty of Medicine &amp; Health Science, Macquarie University, NSW, Australia; Universite de Nantes, LEMNA,F-44000<br/>         Maka, Katherine; Western Sydney Local Health District<br/>         Mitchell, Rebecca; Macquarie University, Australian Institute of Health Innovation<br/>         Zurynski, Yvonne; Macquarie University, Australian Institute of Health Innovation<br/>         Long, Janet; Australian Institute of Health Innovation, Australian Institute of Health Innovation<br/>         Rapport, Frances ; Macquarie University, Australian Institute of Health Innovation<br/>         Arnolda, Gaston; Macquarie University Faculty of Medicine and Health Sciences, Australian Institute of Health Innovation<br/>         Loy, Graeme; Western Sydney Local Health District<br/>         Braithwaite, Jeffrey; Macquarie University, Australian Institute of Health Innovation</p> |
| Keywords:                     | <p>Organisation of health services &lt; HEALTH SERVICES ADMINISTRATION &amp; MANAGEMENT, Organisational development &lt; HEALTH SERVICES ADMINISTRATION &amp; MANAGEMENT, Protocols &amp; guidelines &lt; HEALTH SERVICES ADMINISTRATION &amp; MANAGEMENT</p>                                                                                                                                                                                                                                                                                                                                                                                                                                                                                                                                                                                                                                                                                                                                                                                                                                                                                                                                                                                                                                                                                                                                      |
|                               |                                                                                                                                                                                                                                                                                                                                                                                                                                                                                                                                                                                                                                                                                                                                                                                                                                                                                                                                                                                                                                                                                                                                                                                                                                                                                                                                                                                                    |

SCHOLARONE™  
Manuscripts

1  
2  
3 **Innovative models of care for the health facility of the future: a protocol for a mixed-**  
4 **methods study to elicit consumer and provider views**  
5  
6  
7

8 Ann Carrigan<sup>1,2</sup>, Natalie Roberts<sup>1</sup>, Robyn Clay-Williams<sup>1</sup>, Peter Hibbert<sup>1</sup> Chiara Pomare<sup>1</sup>,  
9 Zeyad Mahmoud<sup>1</sup>, Katherine Maka<sup>3</sup>, Rebecca Mitchell<sup>1</sup>, Yvonne Zurynski<sup>1</sup>, Janet Long<sup>1</sup>,  
10 Frances Rapport<sup>1</sup>, Gaston Arnolda<sup>1</sup>, Graeme Loy<sup>3</sup>, Jeffrey Braithwaite<sup>1</sup>  
11  
12  
13  
14  
15  
16

17 <sup>1</sup> Australian Institute of Health Innovation, Centre for Healthcare Resilience and  
18 Implementation Science, Macquarie University, Sydney, New South Wales, Australia  
19

20 <sup>2</sup>Centre for Elite Performance, Expertise & Training,  
21 Macquarie University, Sydney, NSW, Australia.  
22

23 <sup>3</sup> Western Sydney Local Health District, Sydney, New South Wales, Australia  
24  
25  
26  
27  
28  
29  
30  
31  
32  
33  
34  
35  
36  
37  
38  
39  
40  
41  
42  
43

44 **Correspondence to:**

45 Robyn Clay-Williams

46 [robyn.clay-williams@mq.edu.au](mailto:robyn.clay-williams@mq.edu.au)  
47  
48

49 Peter Hibbert

50 [peter.hibbert@mq.edu.au](mailto:peter.hibbert@mq.edu.au)  
51  
52  
53  
54  
55  
56  
57

58 Word count: 4580  
59  
60

## ABSTRACT

**Introduction:** The delivery of healthcare is dramatically changing in the face of new and enhanced technologies, increasing social and economic burdens of ageing populations, and the prevalence of chronic disease. To address these growing challenges, governments and health services are increasingly emphasising healthcare delivery models that are flexible, person-centred, cost-effective and integrate hospital services more closely with primary healthcare and social services. In addition, such models increasingly embed consumer co-design and leverage digital technologies. Examples include clinical dashboards, decision support tools, telehealth and sophisticated medical records systems introduced into hospital workflows, to deliver care more seamlessly and continually improve their services.

**Objectives:** This paper provides a study protocol to describe a method to elicit consumer and healthcare provider needs and expectations for the development of innovative care models.

**Methods and analysis:** A mixed-methods study of consumer members' and health providers' needs and expectations. Data collection includes a short consumer- and provider-specific, demographic questionnaire (delivered during the recruitment process), facilitator-coordinated consultation workshops, and follow-up interviews. Data will be analysed thematically (qualitative) and statistically (quantitative).

**Ethics and dissemination:** The results will be actively disseminated through peer-reviewed journals, conference presentations and in a report to stakeholders. This study was reviewed and approved by the relevant Ethics Committee in New South Wales, Australia.

### Strengths and limitations of this study

- The study will be the first of its kind to identify the key evidence-based, innovative models of health care, considering the benefits and implementation considerations for each model, as perceived by consumers and healthcare providers.
- The study design was developed in collaboration with the Local Health District where the health facility will be located.
- A key strength of the study is the use of mixed-methods and the triangulation of data from multiple sources.
- A key limitation of the study is that the structure of workshops focused on specific scenarios which may not be generalisable.

Peer review only

## BACKGROUND

1  
2  
3  
4  
5  
6  
7  
8  
9  
10  
11  
12  
13  
14  
15  
16  
17  
18  
19  
20  
21  
22  
23  
24  
25  
26  
27  
28  
29  
30  
31  
32  
33  
34  
35  
36  
37  
38  
39  
40  
41  
42  
43  
44  
45  
46  
47  
48  
49  
50  
51  
52  
53  
54  
55  
56  
57  
58  
59  
60

Around the world, the delivery of quality hospital care is transforming in response to the availability of new and enhanced technologies and increasing demand for care.<sup>1</sup> Challenges to extant healthcare systems include an increase in the proportion of older adults in the population<sup>2-4</sup> that will redirect the focus of health towards long-term and chronic care.<sup>3</sup> Increased demand on the healthcare system comes from multiple sources, including higher prevalence of chronic diseases such as obesity, kidney failure<sup>5</sup> and cognitive decline.<sup>3</sup> The shift to patient-centred healthcare models<sup>3</sup> will also have resource implications while aiming for improvements in patient and staff satisfaction and quality of care.<sup>6</sup> To address the growing challenges globally, health services and governments are experimenting with more cost-effective care alternatives often delivered outside hospitals walls,<sup>7</sup> prioritising greater consumer engagement<sup>8,9</sup> and investing in digitised care services.<sup>10</sup> Digital services allow care to be more personalised, integrated with existing models, and delivered remotely (e.g., telemedicine). In applying advanced technologies such as robotics, artificial intelligence (AI) and big data analytics into hospital workflows, architects of new care models are seeking to provide more seamless care and continual improvement in services.<sup>4</sup> In 2018, Braithwaite and colleagues identified key trends shaping the health systems of the future: global demographic dynamics, work in creating sustainable health systems, evolving technologies such as genomics and AI, and new models of care. New models of care are emerging to meet new circumstances. For example, the COVID-19 global health pandemic in 2020 acted as a catalyst or trigger for change (e.g., rapid adoption of telehealth) that have been called for previously by those who suffer chronic conditions<sup>11</sup>. E-health, telehealth and virtual care models allowed patients to remain socially distant rather than having physical contact with the community and health services, simultaneously reducing the risk of the virus

1  
2  
3 spreading among patients and healthcare providers.<sup>12</sup> These innovative models take a novel  
4 approach to provide high quality and safe care in and out of hospital settings.<sup>13</sup>  
5

6  
7 In Australia, the New South Wales (NSW) government announced funding for a new health  
8 facility at Rouse Hill. The Western Sydney Local Health District (LHD) is planning the new  
9 health facility and is seeking innovative ways of delivering care that are more accessible,  
10 efficient, and effective for healthcare providers, funders and the population. In consultation  
11 with our research team, it was believed that there was an opportunity to create a different  
12 kind of facility – a modern and digitally-enabled capability. Seeking views from consumers  
13 and providers will ensure that the way the facility provides services is deeply connected to  
14 community needs.  
15

16  
17 The goal of this project is to provide a research-based approach to develop an innovative  
18 health facility and health service; one that delivers a high-quality care solution for the  
19 community rather than simply establishing more hospital beds, departments, units, and wards.  
20 Realising this vision will have far-reaching implications for the design and delivery of health  
21 services in the future. But to develop any new model for integrating community and hospital  
22 acute care and support services, we need to turn to the community and health care providers  
23 to understand their expectations and the healthcare needs that may be met by innovative  
24 models of care. While we are gaining data to inform the construction and design of a  
25 “hospital”, we use the term “health facility” to reflect blue sky thinking and avoid being  
26 constrained by language that implies a large conglomeration of buildings and beds.  
27

### 28 **Identifying evidence-based models of care**

29  
30 Before eliciting consumers’ and providers’ needs and expectations, we needed to assess the  
31 evidence to identify candidate models of care. We therefore undertook a grey literature  
32 review to identify potential models of care, followed by an academic review of the  
33 international evidence supporting the efficacy of these models.  
34  
35  
36  
37  
38  
39  
40  
41  
42  
43  
44  
45  
46  
47  
48  
49  
50  
51  
52  
53  
54  
55  
56  
57  
58  
59  
60

1  
2  
3 The grey literature review involved an advanced search using Google and included websites  
4 such as World Health Organization and Organization for Economic Co-operation and  
5  
6 Development (OECD) using search terms such as “future hospital”. Two reviewers  
7  
8 completed a title and abstract screen and three reviewed the full-text documents. Eighty-five  
9  
10 documents were included, comprising 55 reports, 17 online newspaper articles, 10 articles or  
11  
12 bulletins from organisation websites, two online articles and an opinion piece. From this  
13  
14 review, seven themes were deductively determined that were used to group innovative  
15  
16 models of health care (see Table 1). Benefits, drawbacks, and past implementation of the  
17  
18 models were also identified.  
19  
20  
21  
22

23  
24 The Preferred reporting Items for Systematic Reviews (PRISMA) was used to guide the  
25  
26 academic literature review to extract the evidence-based support for the models of care  
27  
28 identified in the grey literature.<sup>14</sup> Search strings chosen from prevalence data of the focal  
29  
30 community in the context of the models were applied to three academics databases  
31  
32 (PsychINFO, Ovid MEDLINE, and CINAHL). For example, “virtual hospital” AND “cardiac  
33  
34 arrest”. Sixteen reviewers (eights pairs) completed a title and abstract screen and  
35  
36 subsequently reviewed the full-text documents. Given the large numbers of papers resulting  
37  
38 from the searches (i.e., over 200,000 results), the researchers confined the searches to review  
39  
40 papers only. Sixty-one peer-reviewed, English language review studies with human subjects,  
41  
42 dated 2016-2021, met the criteria for inclusion. This review will be reported separately.  
43  
44  
45  
46  
47  
48  
49  
50  
51  
52  
53  
54  
55  
56  
57  
58  
59  
60



Table 1: Seven evidence-based innovative models of care

| Model                                    | Description                                                                                                                                                              | Example                                                                                                                    |
|------------------------------------------|--------------------------------------------------------------------------------------------------------------------------------------------------------------------------|----------------------------------------------------------------------------------------------------------------------------|
| Consumer focused care                    | During planning, delivery, and evaluation, consumers, carers, and families are placed at the centre of care.                                                             | Individualised self-management support in early chronic kidney disease transition of care plan <sup>5</sup>                |
| Ambulatory care and diagnostic hospitals | Non-admitted services, where patient care does not involve an overnight stay and usually involves diagnosis and treatment on the same day.                               | Same day joint arthroplasty <sup>15</sup>                                                                                  |
| Digital hospitals                        | Hospitals that make extensive use of new technologies to provide streamlined care, improve patient safety and care quality, and improve overall care cost effectiveness. | Machine learning algorithm for prediction of post-total hip arthroplasty complications <sup>16</sup>                       |
| Hospital in the home                     | Some or all of patient care and consultation which is typically delivered in the hospital settings is delivered to patients in their own home.                           | Early discharge hospital at home care for chronic obstructive airways disease managed by a community service <sup>17</sup> |
| Integrated care                          | Multidimensional needs of the patient are delivered in a coordinated manner by an interdisciplinary team or network of healthcare professionals                          | Orthogeriatric fracture service <sup>18</sup>                                                                              |

|                                                         |                                                                                                                                                                                                      |                                                                    |
|---------------------------------------------------------|------------------------------------------------------------------------------------------------------------------------------------------------------------------------------------------------------|--------------------------------------------------------------------|
| Virtual care                                            | Patient care and consultation delivered through telephone or video communication.                                                                                                                    | Telehealth management in patients with heart failure <sup>19</sup> |
| Specialist hospitals and population specific care units | Specialist hospitals provide selective care services for targeted patient groups. Population-specific care units are pathways within general hospitals dedicated to treatment of specific conditions | Comprehensive cancer centres <sup>20</sup>                         |

## METHODS

### Study Aim

The study aims to elicit health consumers' and healthcare providers' needs drawn from the local community and expectations of a new health facility, and how these needs may be met through the delivery of innovative models of care.

### Study Design

We will conduct a mixed-methods study of consumer and provider needs and expectations in relation to innovative models of care delivery for a new health facility. As illustrated in Figure 1, the design comprises collections of consumer and provider data via a short expression of interest (EOI) questionnaire comprising demographic information (as part of the recruitment process), facilitator-coordinated workshops, and supplementary interviews. Data collection will occur in a sequential manner, where results from the EOI questionnaire will inform workshop design. In addition, interview design and recruitment will be informed by the learnings from the workshops. Together, these methods of data collection will facilitate a varied and dynamic exploration of community and provider needs and expectations for innovative models of healthcare (see Figure 1).

1  
2  
3 FIGURE 1 HERE  
4  
5  
6  
7

## 8 **Study Setting**

9  
10 The project will be conducted online and in person. Specifically, the recruitment  
11 demographic questionnaire will be hosted and completed online. The face-to-face workshops  
12 will be held at public metropolitan hospitals and community centres in New South Wales  
13 (NSW), Australia. Participants will be provided with options to attend workshops during, or  
14 outside of working hours. For face-to-face workshops, we will follow all current COVID-19  
15 guidelines that are current at the time of data collection (e.g., social distancing, wearing of  
16 masks). In addition, the meeting format will be adjustable to being video-enabled to respond  
17 to any face-to-face restrictions in place associated with the COVID-19 pandemic.  
18  
19

20 Supplementary interviews with interested participants identified in the workshops will be  
21 conducted via an online platform such as Zoom or over the telephone for participant  
22 convenience.  
23  
24

25 The catchment area where a new health facility is currently being planned comprises a land  
26 area of almost 500 square kilometres and a population estimated in 2019 to be 300,000  
27 residents estimated in 2019. Between the 2006 and 2016 population censuses, the catchment  
28 experienced a population growth rate of 29% and this growth rate was predicted to rise when  
29 assessed using the 2021 census data.<sup>21 22</sup> The 2016 Census reported that adults aged 35-44  
30 years and school aged children aged 5-9 years were the largest age groups, 37% of the  
31 population was born outside Australia and 0.9% identified as Aboriginal and/or Torres Strait  
32 Islander.<sup>23</sup>  
33  
34

## 35 **Procedures**

36  
37  
38  
39  
40  
41  
42  
43  
44  
45  
46  
47  
48  
49  
50  
51  
52  
53  
54  
55  
56 *Recruitment:*  
57  
58  
59  
60

1  
2  
3 Consumer members will include residents and patient representatives within the new health  
4 facility catchment (49 suburbs) as defined by the LHD's planning team on 16<sup>th</sup> July 2021.

5  
6  
7 The participants will be recruited through the LHD's network and connections via email,  
8  
9  
10 postings in local newspapers and through Facebook invitations. For providers, emails will be  
11  
12 sent by the LHD to potential participating providers such as healthcare professionals and  
13  
14 support staff, and community members via their established connections. These connections  
15  
16 include, but are not limited to, consumer networks, LHD community newsletters, migrant  
17  
18 resources centres, the Primary Health Network, and the Youth Advisory Council. To reach  
19  
20 potential consumer participants who may not have access to email or the internet, the  
21  
22 invitation will also be posted in local newspapers and advertised as flyers at LHD hospitals.  
23  
24 For providers, emails will be distributed via the LHD's Broadcast system, the Primary Health  
25  
26 Network, and from the Chief Executive Officer.  
27  
28  
29

30  
31 As 37% of the consumers are from culturally and linguistically diverse (CALD) backgrounds,  
32  
33 non-English speaking participants will invited to participate in the study, aided by bi-lingual  
34  
35 interpreters from the LHD. The research materials comprising the invitation, EOI  
36  
37 questionnaire, workshop and interview scripts will be translated into the five most prevalent  
38  
39 non-English languages in the community - Hindi, Punjabi, Mandarin, Korean and Arabic.  
40  
41

42  
43 For those accessing the research invitation electronically (via email or Facebook  
44  
45 advertisements), the invitation will include a link to an online EOI questionnaire using  
46  
47 REDCap electronic data capture tools.<sup>24</sup> The questionnaire will collect demographic data  
48  
49 including age, gender, location, ethnicity and contact information. The providers will be  
50  
51 asked to indicate their role and specialty, and the consumers will be asked for pertinent health  
52  
53 information such as whether they have a chronic health condition. Responses to the  
54  
55 questionnaire will be taken as implied consent for collection of the demographic information.  
56  
57  
58  
59  
60

1  
2  
3 The provided contact information will be used to send the participant details about the  
4 location and time of the workshops (either via phone or email – as selected by the  
5 participant). For all participants who attend a workshop, we will ask for written informed  
6 consent prior to commencement of the workshop. Participants will be sent the Participant  
7 Information and Consent Form (PICF) prior to the workshop so that they can come prepared  
8 with questions for the research team. Once participants sign the consent form, the research  
9 staff will photocopy the PICF and provide a copy to each consenting participant. In the event  
10 of delivering the workshops online, a link will be sent to the participants for access to the  
11 PICF presented using REDCap tools.<sup>24</sup>

12  
13  
14 Interview participants will be recruited following the workshops. After each workshop, those  
15 who express interest will be contacted for a follow-up interview to confirm the findings. The  
16 PICF for the workshop informs participants that they may be contacted after the workshop to  
17 be invited to a follow-up interview. Figure 2 provides a map of the recruitment process for  
18 consumers and providers.

19  
20  
21  
22  
23  
24  
25  
26  
27  
28  
29  
30  
31  
32  
33  
34  
35  
36  
37  
38  
39  
40  
41  
42  
43  
44  
45  
46  
47  
48  
49  
50  
51  
52  
53  
54  
55  
56  
57  
58  
59  
60  
INSERT FIGURE 2 HERE

#### *Workshops:*

There will be a total of 16 workshops across two streams of eight: one stream for health providers and another for consumer members. Each workshop has been designed to elicit responses to the seven models of care. To do this, we will divide participants into smaller parallel groups that each will examine three models of care in detail, rather than present all seven models and induce fatigue. The models have been counterbalanced across the eight workshops, to ensure that the presentation and order of each model is balanced. There will be up to eight facilitators and scribes at each workshop (a facilitator and scribe per group).

Where needed, some groups within the workshops will be supported by bi-lingual

1  
2  
3 interpreters. The number of participants in each workshop group has been designed based on  
4 our collective research experience as an appropriate number for elicitation of the data we are  
5 seeking and is consistent with the number of participants in focus groups where people feel  
6 relatively comfortable speaking to others.<sup>25</sup>  
7  
8  
9

10  
11  
12 The workshops will start with a short explanation by a research team lead, explaining that the  
13 purpose of the workshop is to capture the needs of the consumers or providers and their  
14 perspectives on innovative models of care delivery. They will then allocate the researchers  
15 and participants to the groups. Within each group, the researchers will take notes, facilitate  
16 discussion, and ask probing questions. Audio-recording devices, and researcher notes will be  
17 used to capture the content of discussions.  
18  
19

20  
21 After a brief icebreaker activity, the researchers will then ask questions to probe the  
22 participants' digital literacy (e.g., "How comfortable are you using a smart phone/smart  
23 watch/computer?"). Workshop scenarios and questions have been designed around the seven  
24 innovative models of care identified in the literature review (Table 1). The priority conditions  
25 used in the scenarios have been identified from the demographic data provided by the LHD  
26 as the most common burdens of disease in the new health facility catchment and are listed  
27 below:  
28  
29  
30  
31  
32  
33  
34  
35  
36  
37  
38  
39  
40  
41

- 42 1. Cardiac arrest, chest pain, acute myocardial infarction, congestive heart failure.
  - 43 2. Fractures, knee replacement, hip replacement, joint replacement, abnormal gait, bone  
44 disease, osteoporosis.
  - 45 3. Abdominal pain, pelvic pain, gastrointestinal pain.
  - 46 4. Pneumonia, asthma, chronic obstructive pulmonary disease.
  - 47 5. Postnatal depression.
  - 48 6. Dialysis (haemodialysis etc.), kidney disease, end stage kidney disease.
- 49  
50  
51  
52  
53  
54  
55  
56  
57  
58  
59  
60

Scenarios will be presented to participants for each model of care (see Table 2). Three of the seven models along with the scenarios will be presented in each workshop.

Table 2: Models of care and scenarios

| Model                                    | Scenario                                                                                                                                                                                                                                                                                                                                                                                                                           |
|------------------------------------------|------------------------------------------------------------------------------------------------------------------------------------------------------------------------------------------------------------------------------------------------------------------------------------------------------------------------------------------------------------------------------------------------------------------------------------|
| Ambulatory care and diagnostic hospitals | “Maria is a 45 year old woman who is able to walk unaided and travels to a centre for treatment 2-3 times per week (e.g., renal dialysis in a shopping centre, or chemotherapy).”                                                                                                                                                                                                                                                  |
| Digital Hospital                         | “John is a 70-year-old man who has a heart condition that causes dizziness (e.g., irregular heartbeat). As this places him at a high risk of falls, he has been admitted to hospital for monitoring. Beside his bed is a digital matt that detects and alerts the staff if he has had a fall.”                                                                                                                                     |
| Hospital in the Home                     | “Jenny is a 35-year-old, single mother of three who developed a breast infection with an abscess following the birth of her baby. She was treated with intravenous antibiotics (on a drip) and a tube was placed into her breast to drain the infected fluid. After 24 hours, she returned home to her children and is provided wound care and support in her home from a visiting nurse.”                                         |
| Integrated Care                          | “Steve is a 50-year-old man with Type II diabetes who is obese and smokes a packet of cigarettes a day. He is having trouble walking so visits his local Emergency Department where he sees a General Practitioner (GP), who has a practice in an office next to the Emergency Department. The GP diagnoses a foot ulcer and identifies that Steve requires a full review of his care. Steve will be looked after in hospital by a |

|                                                          |                                                                                                                                                                                                                                                                                                                                                                                                                                                                                                                                                                                 |
|----------------------------------------------------------|---------------------------------------------------------------------------------------------------------------------------------------------------------------------------------------------------------------------------------------------------------------------------------------------------------------------------------------------------------------------------------------------------------------------------------------------------------------------------------------------------------------------------------------------------------------------------------|
|                                                          | multidisciplinary team of healthcare professionals (e.g., endocrinologist, ulcer team, nutritionist) using an electronic medical record system for communication.”                                                                                                                                                                                                                                                                                                                                                                                                              |
| Virtual /Consumer Focused Care                           | “Ivy is a 40-year-old woman who developed chest pain along with an irregular heartbeat following a dental procedure. She visited the local Emergency Department where no abnormality was found and was discharged. As she was still concerned about a sudden heart attack, she was fitted with a digital heart monitor with chest leads that talked to an application on her smart watch. Ivy was shown how to indicate an unusual heart event using her watch. Anytime Ivy tagged an event, the information was sent to a health care professional at the moment it happened.” |
| Specialist hospitals and population specific care units: | “Harrold is an 82-year-old man with mild dementia, who develops a urinary tract infection. He has been referred to a specialist dementia unit in a geriatric care ward at the local hospital. Harrold and his family are reassured that he will receive the highest level of evidence-based care for dementia from a specialised team of health professionals.”                                                                                                                                                                                                                 |

Following the presentation of each scenario, we will ask general questions about the model’s strengths and weaknesses, usability and safety for themselves and people in their care. For providers, we will ask them about barriers and enablers from their own and their patients’ perspective, with respect to each model of care. At the end of each workshop, the participants will be asked to indicate their preferred model of care via a poll. Example facilitator scripts for the consumer and provider groups are provided in Supplementary File 1.

Each workshop will be planned for a two-hour duration with a five-minute break after the first hour. Each participant will be invited to participate in one workshop but will be offered a



1  
2  
3 series of dates to choose from. Participants will not be paid for their participation but those  
4  
5 who attend in-person will be provided with refreshments.  
6

7  
8 *Participants:*  
9

10 The consumer workshops will include residents of the new health facility catchment area.  
11  
12 Provider workshops will comprise health providers that provide care or are likely to provide  
13  
14 care, and stakeholders who make decisions about provision of care such as LHD executives  
15  
16 and administrators, for the catchment population. In a first wave of data collection, we will  
17  
18 recruit 15-30 participants for each of the workshops (this estimation takes into consideration  
19  
20 participant loss to follow-up). Six workshops will result in approximately 120 health  
21  
22 providers and 120 consumer member participants (240 participants in total). However, the  
23  
24 number of participants invited to each workshop may be influenced by government mandated  
25  
26 COVID-19 restrictions at the time of data collection. In a second wave, up to 40, non-English  
27  
28 speaking, CALD participants will be recruited with the support of the LHD's Multicultural  
29  
30 Health Team.  
31  
32

33  
34 In parallel, there will be a third, but separate but aligned, wave of data collection, to include  
35  
36 consultation with Aboriginal and Torres Strait Islander Elders. Consultation with these  
37  
38 community members will involve a formal process of consultation with Aboriginal Liaison  
39  
40 Officers in the LHD to develop an Aboriginal Health Impact Statement and associated ethics  
41  
42 proposal. This consultation will be conducted in-person to ensure this is conducted in a  
43  
44 culturally respectful manner as directed by the Aboriginal Liaison Officers in the LHD.  
45  
46  
47  
48

49 *Inclusion criteria:*  
50

51 All participants will be 18 or older and will either have English language competence  
52  
53 (written and spoken), or interpreter assisted non-English language (written and spoken),  
54  
55 sufficient to provide verbal informed consent. The study is open to all community members,  
56  
57 but we will also specifically seek to recruit participants representative of the six specific  
58  
59  
60

1  
2  
3 health conditions/services by targeting recruitment of condition networks associated with  
4 these health conditions.  
5  
6

7 Those who currently provide care to those residing in the catchment for the new health  
8 facility, or who make decisions about provision of care for those residing in the catchment,  
9 are eligible to participate. This will include general practitioners and other health providers  
10 such as community nurses and services, allied healthcare professionals, aged care facilities,  
11 community care organisations, the primary health network, community care providers, the  
12 ambulance service, and other identified stakeholders. The inclusion criteria are broad enough  
13 to capture any health provider in the LHD or new health facility catchment, but we will also  
14 target participants whose work relates to patients in the six specific listed conditions or  
15 services.  
16  
17  
18  
19  
20  
21  
22  
23  
24  
25  
26  
27

#### 28 *Interviews:*

29  
30 Supplementary to the workshop, we will invite those participants who are key stakeholders  
31 but were unable to participate in the workshop, or those who indicate an interest during the  
32 workshops to participate in semi-structured interviews. The purpose of these interviews is to  
33 expand on areas of interest and verify the findings from the workshop data. Interviews will be  
34 audio-recorded and are expected to last approximately 45 minutes. The interview script  
35 commences with “For Model X, can you please elaborate on what you think is meant by the  
36 strengths/barriers/enablers/safety issues...”, and is deliberately open ended to allow the  
37 participant to freely express their views. The interview script is provided in Supplementary  
38 file 2.  
39  
40  
41  
42  
43  
44  
45  
46  
47  
48  
49  
50

#### 51 *Data collection:*

52  
53 Participants’ demographic information (e.g., age, gender) and health-relevant data will be  
54 collected through the EOI questionnaire. Consumers will be asked about their experiences  
55 using acute, chronic and outpatient services, their ethnicity, language spoken at home, and  
56  
57  
58  
59  
60

1  
2  
3 residential postcode. Providers will be asked to indicate their role, specialty, whether they are  
4 employed by the LHD, and work postcode. In the case of workshops being delivered online,  
5  
6 participants will be sent their information and consent forms to sign prior to attending.  
7  
8

9  
10 The workshops and supplementary interviews will be run by a team of experienced health  
11 services researchers and will explore the experiences and views of participants with respect to  
12 innovative models of care. Responses will be audio recorded. Key themes and different  
13 points of view will be identified and recorded for qualitative analysis. Each group within a  
14 workshop will provide their written notes and observations to the workshop facilitator who  
15 will collate the data. The data will then be aggregated across all the workshops for analysis,  
16 separately for consumers and providers.  
17  
18

19  
20  
21  
22  
23  
24  
25  
26 *Planned data analyses:*  
27

28 The quantitative data that includes demographic and health related data from the EOI  
29 questionnaire will be analysed using SPSS V.22.0 and weighted against the Australian  
30 Bureau of Statistics data for the catchment, to assess representativeness of the sample.  
31  
32

33 Consumer and provider workshop and interview data for each model will be merged into two  
34 aggregated, narrative summaries, one for consumers and one for providers. All participants  
35 will be de-identified, and any identifiable features of the experiences or personal details  
36 shared in the group will be changed (e.g., if a unique service or practitioner is mentioned; or  
37 features of the disease which identifies the patient). Data collected in the focus groups and  
38 interviews will only be used for the purpose of this research project.  
39  
40

41 Aggregated data sets will be analysed separately for consumers and providers. Qualitative  
42 data (i.e., facilitator notes and key elements of the workshop recordings) will be thematically  
43 analysed independently using an open coding process by two members of the research team.  
44  
45

46 Themes will be extracted that characterise the expectations and needs of the consumer  
47 members and health providers of the new health facility catchment. Data collection and  
48  
49  
50  
51  
52  
53  
54  
55  
56  
57  
58  
59  
60

1  
2  
3 analysis will occur iteratively; questions used for workshops and guides for observations will  
4  
5 be refined and expanded as new findings emerge.  
6

7  
8 *Synthesising and integrating results:*  
9

10 Data will be synthesised using a triangulated approach, whereby literature review findings,  
11  
12 community characteristics, and findings from the focus groups and interviews will be  
13  
14 integrated to arrive at a set of evidence-based, community-and-provider-supported strategies  
15  
16 for delivering care to those in the healthcare catchment. Figure 3 illustrates the data  
17  
18 collection, analysis and synthesis strategy for the project. Triangulated findings will be used  
19  
20 to inform planning options and feasibility of implementation of the options for development  
21  
22 of the new health facility.  
23  
24  
25  
26  
27

28 INSERT FIGURE 3 HERE  
29  
30  
31

32 *Patient and Public Involvement*  
33

34 No patient involved. No patient data is reported in this paper.  
35  
36  
37  
38

39 **Discussion**  
40

41 This study seeks to examine consumer and provider needs and expectations for the  
42  
43 development of an innovative care model for a health facility, specifically pertaining to seven  
44  
45 evidence-based models of care and the health conditions that form major burdens of disease  
46  
47 found in a diverse catchment area in metropolitan NSW, Australia. The study investigates  
48  
49 community perspectives on each model of care in detail, each presented within a purpose-  
50  
51 designed, contextualised health scenario. Healthcare delivery is changing due to the  
52  
53 introduction of new and enhanced technologies, the increasing social and economic burdens  
54  
55 of ageing populations, and the prevalence of chronic disease, amongst other factors.  
56  
57  
58 Therefore, it is important that we use these findings to guide the development of new  
59  
60

1  
2  
3 healthcare facilities to ensure that both consumer and provider needs are met. These findings  
4  
5 may be used to inform policies on how to design new healthcare facilities in consideration of  
6  
7 consumer and provider needs.  
8  
9

10 The limitations of this study may include the following factors. Due to the scope of the  
11  
12 project, we cannot include an exhaustive list of health conditions. We have used a data-driven  
13  
14 approach to stratify the main diseases reported in the new catchment as defined by the LHD.  
15  
16

17 In addition, this study is limited to the local health district under investigation and the specific  
18  
19 needs of the consumer and providers in that district. Finally, the catchment area could change  
20  
21 as the LHD redefines its boundaries.  
22  
23

### 24 **Expected outcomes**

25  
26 Adopting an evidence-based approach, we will elicit opinions from consumers and providers  
27  
28 within the catchment of a new healthcare facility about the barriers and enablers pertaining to  
29  
30 seven innovative models of care. This will provide a care model for future health facility  
31  
32 development, in Australia and globally. Ultimately, the outcomes will help to ease the  
33  
34 burdens that many health facilities face such as the increasing social and economic burdens of  
35  
36 ageing populations, and the prevalence of chronic disease.  
37  
38  
39  
40  
41

42 **Ethics and Dissemination:** There are no known health or safety risks associated with  
43  
44 participation in any aspect of the described study. Ethics approval for conducting the study  
45  
46 was obtained from the Local Health District Human Research Ethics Committee  
47  
48 (2021/PID01000). The results will be actively disseminated through peer-reviewed journals,  
49  
50 conference presentations and reports to stakeholders.  
51  
52

53 **Contributors:** GL, JB, RCW and PH conceptualised the study. AC, NR, CP, ZM, RCW, PH,  
54  
55 KM and JB contributed to the design of the study. AC drafted the initial manuscript, assisted  
56  
57  
58  
59  
60

1  
2  
3 by NR, CP, ZM, RCW, PH and JB. All authors contributed to the refinement of the paper and  
4  
5 approved the final manuscript.  
6

7  
8 **Acknowledgements:** The authors wish to thank Natasia Seo, Anita Calderan and Chrissan  
9  
10 Segaram for their advice, and assistance obtaining the demographic data for the health facility  
11  
12 catchment area. The authors also wish to thank Monika Latanik and the Local Health  
13  
14 District's Multicultural Unit for their assistance with CALD recruitment and interpretation  
15  
16 services.  
17

18  
19 **Data availability statement:** No additional data available.  
20

21  
22 **Funding:** The study was funded by Health Infrastructure (NSW, Australia), as an  
23  
24 independent consultancy to support a larger project developing and implementing a new  
25  
26 health facility in Sydney, Australia. Grant number HI20314. The funder did not play a part in  
27  
28 the design, conduct or reporting of this study.  
29

30  
31 **Competing interests:** Nil to declare  
32

33  
34 **Disclaimer:** The views expressed herein are the personal views of the authors and not  
35  
36 necessarily those of Western Sydney Local Health District, Health Infrastructure, or the NSW  
37  
38 Ministry of Health, and are not to be understood or quoted as being made on behalf of or  
39  
40 reflecting the positions of those organisations.  
41

42  
43 **Patient consent for publication:** Participants will provide written consent in accordance  
44  
45 with the HREC-approved Patient Information and Consent Form, which detailed how the  
46  
47 findings would be disseminated. No patient data is reported in this paper.  
48

49  
50 **Provenance and peer review:** Not previously submitted or under consideration elsewhere.  
51

52  
53 **Exclusive License:** I, the Submitting Author has the right to grant and does grant on behalf  
54  
55 of all authors of the Work (as defined in the below author licence), an exclusive licence  
56  
57 and/or a non-exclusive licence for contributions from authors who are: i) UK Crown  
58  
59 employees; ii) where BMJ has agreed a CC-BY licence shall apply, and/or iii) in accordance  
60

1  
2  
3 with the terms applicable for US Federal Government officers or employees acting as part of  
4 their official duties; on a worldwide, perpetual, irrevocable, royalty-free basis to BMJ  
5  
6 Publishing Group Ltd (“BMJ”) its licensees and where the relevant Journal is co-owned by  
7  
8 BMJ to the co-owners of the Journal, to publish the Work in BMJ Open and any other BMJ  
9  
10 products and to exploit all rights, as set out in our [licence](#).  
11  
12  
13  
14  
15  
16

17 The Submitting Author accepts and understands that any supply made under these terms is  
18 made by BMJ to the Submitting Author unless you are acting as an employee on behalf of  
19 your employer or a postgraduate student of an affiliated institution which is paying any  
20 applicable article publishing charge (“APC”) for Open Access articles. Where the Submitting  
21 Author wishes to make the Work available on an Open Access basis (and intends to pay the  
22 relevant APC), the terms of reuse of such Open Access shall be governed by a Creative  
23 Commons licence – details of these licences and which [Creative Commons](#) licence will apply  
24 to this Work are set out in our licence referred to above.  
25  
26  
27  
28  
29  
30  
31  
32  
33  
34  
35  
36  
37

38 Figure 1: Data collection points over time for consumer and provider groups.

39 Figure 2: Recruitment process map

40 Figure 3: Recruitment process and data plan for the project  
41  
42  
43  
44  
45  
46  
47  
48  
49  
50  
51  
52  
53  
54  
55

## 56 **References**

57  
58  
59  
60

1. Braithwaite J, Mannion R, Matsuyama Y, et al. Healthcare systems: future predictions for global care. Boca Raton, Florida: CRC Press 2018.
2. Amalberti R, Nicklin W, Braithwaite J. Preparing national health systems to cope with the impending tsunami of ageing and its associated complexities: Towards more sustainable health care. *Int J Qual Health Care* 2016;28(3):412-4. doi: 10.1093/intqhc/mzw021 [published Online First: 2016/03/17]
3. Braithwaite J, Mannion R, Matsuyama Y, et al. The future of health systems to 2030: a roadmap for global progress and sustainability. *Int J Qual Health Care* 2018;30(10):823-31.
4. Penno E, Gauld R. Change, Connectivity, and Challenge: Exploring the Role of Health Technology in Shaping Health Care for Aging Populations in Asia Pacific. *Health Syst Reform* 2017;3(3):224-35. doi: 10.1080/23288604.2017.1340927 [published Online First: 2017/07/03]
5. Havas K, Douglas C, Bonner A. Meeting patients where they are: improving outcomes in early chronic kidney disease with tailored self-management support (the CKD-SMS study). *BMC Nephrol* 2018;19(1):279. doi: 10.1186/s12882-018-1075-2 [published Online First: 2018/10/22]
6. Joseph A, Kirk Hamilton D. The Pebble Projects: coordinated evidence-based case studies. *Build Res Inf* 2008;36(2):129-45. doi: 10.1080/09613210701652344
7. Conley J, O'Brien CW, Leff BA, et al. Alternative strategies to inpatient hospitalization for acute medical conditions: a systematic review. *JAMA Internal Medicine* 2016;176(11):1693-702.
8. Chewning B, Bylund CL, Shah B, et al. Patient preferences for shared decisions: a systematic review. *Patient Educ Couns* 2012;86(1):9-18.



- 1  
2  
3 9. Frist WH. Connected health and the rise of the patient-consumer. *Health aff Web exclusive*  
4  
5 2014;33(2):191-93. doi: 10.1377/hlthaff.2013.1464  
6  
7
- 8 10. Khan A, Mir MS. Digital Hospitals. *Scholarly Journal of Biological Science*  
9  
10 2021;10(1):104-6.  
11
- 12 11. Smith AC, Thomas E, Snoswell CL, et al. Telehealth for global emergencies:  
13  
14 Implications for coronavirus disease 2019 (COVID-19). *J Telemed Telecare*  
15  
16 2020;26(5):309-13. doi: 10.1177/1357633X20916567 [published Online First:  
17  
18 2020/03/21]  
19  
20
- 21 12. Duffy S, Lee TH. In-person health care as option B. *N Engl J Med* 2018;378(2):104-06.  
22
- 23 13. Lansisalmi H, Kivimaki M, Aalto P, et al. Innovation in healthcare: a systematic review  
24  
25 of recent research. *Nurs Sci Q* 2006;19(1):66-72. doi: 10.1177/0894318405284129  
26  
27 [published Online First: 2006/01/13]  
28  
29
- 30 14. Moher D, Liberati A, Tetzlaff J, et al. Preferred reporting items for systematic reviews  
31  
32 and meta-analyses: the PRISMA statement. *PLoS Medicine* 2009;6(7):e1000097.  
33  
34
- 35 15. Carey K, Morgan JR, Lin MY, et al. Patient Outcomes Following Total Joint  
36  
37 Replacement Surgery: A Comparison of Hospitals and Ambulatory Surgery Centers. *J*  
38  
39 *Arthroplasty* 2020;35(1):7-11. doi: 10.1016/j.arth.2019.08.041 [published Online  
40  
41 First: 2019/09/19]  
42  
43
- 44 16. Shah AA, Devana SK, Lee C, et al. Development of a Novel, Potentially Universal  
45  
46 Machine Learning Algorithm for Prediction of Complications After Total Hip  
47  
48 Arthroplasty. *J Arthroplasty* 2021;36(5):1655-62 e1. doi: 10.1016/j.arth.2020.12.040  
49  
50 [published Online First: 2021/01/23]  
51  
52
- 53 17. Bal Özkaptan B, Kapucu S. Home nursing care with the self-care model improves  
54  
55 self-efficacy of patients with chronic obstructive pulmonary disease. *Jpn J Nurs Sci*  
56  
57 2016;13(3):365-77.  
58  
59  
60

- 1  
2  
3  
4  
5  
6  
7  
8  
9  
10  
11  
12  
13  
14  
15  
16  
17  
18  
19  
20  
21  
22  
23  
24  
25  
26  
27  
28  
29  
30  
31  
32  
33  
34  
35  
36  
37  
38  
39  
40  
41  
42  
43  
44  
45  
46  
47  
48  
49  
50  
51  
52  
53  
54  
55  
56  
57  
58  
59  
60
18. Naranjo A, Fernandez-Conde S, Ojeda S, et al. Preventing future fractures: effectiveness of an orthogeriatric fracture liaison service compared to an outpatient fracture liaison service and the standard management in patients with hip fracture. *Arch Osteoporos* 2017;12(1):112. doi: 10.1007/s11657-017-0373-9 [published Online First: 2017/12/13]
  19. Oliveira JAd, Cordeiro RG, Rocha RG, et al. Impact of telephone monitoring on patients with heart failure: a randomized clinical trial. *ACTA Paul Enferm* 2017;30(4):333-42. doi: 10.1590/1982-0194201700050
  20. Grant SJ, Marthick M, Lacey J. Establishing an integrative oncology service in the Australian healthcare setting - the Chris O'Brien Lifecare Hospital experience. *Support Care Cancer* 2019;27(6):2069-76. doi: 10.1007/s00520-018-4460-2 [published Online First: 2018/09/19]
  21. Australian Bureau of Statistics: Australian Statistical Geography Standard (ASGS) 2021. [https://www.abs.gov.au/websitedbs/d3310114.nsf/home/australian+statistical+geography+standard+\(asgs\)](https://www.abs.gov.au/websitedbs/d3310114.nsf/home/australian+statistical+geography+standard+(asgs)) accessed 1 May 2021.
  22. Australian Bureau of Statistics : 2016 Census. <https://www.abs.gov.au/ausstats/abs@.nsf/Lookup/2916.0main+features252016> accessed 1 May 2021 [Available from: <https://www.abs.gov.au/ausstats/abs@.nsf/Lookup/2916.0main+features252016>].
  23. Epidemiology and Health Analytics, Western Sydney Local Health District. Epidemiological Profile - Rouse Hill Catchment Area (RHCA) Residents. 2021. . Sydney: Western Sydney Local Health District, 2021.
  24. Harris PA, Taylor R, Thielke R, et al. Research electronic data capture (REDCap)—a metadata-driven methodology and workflow process for providing translational research informatics support. *J Biomed Inform* 2009;42(2):377-81.

1  
2  
3 25. Bloor M. Focus groups in social research. London: UK: SAGE Publications 2001.  
4  
5  
6  
7  
8  
9  
10  
11  
12  
13  
14  
15  
16  
17  
18  
19  
20  
21  
22  
23  
24  
25  
26  
27  
28  
29  
30  
31  
32  
33  
34  
35  
36  
37  
38  
39  
40  
41  
42  
43  
44  
45  
46  
47  
48  
49  
50  
51  
52  
53  
54  
55  
56  
57  
58  
59  
60

For peer review only

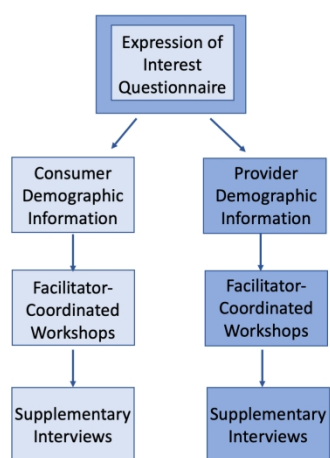

Figure 1: Data collection points over time for consumer and provider groups.

338x190mm (225 x 225 DPI)

1  
2  
3  
4  
5  
6  
7  
8  
9  
10  
11  
12  
13  
14  
15  
16  
17  
18  
19  
20  
21  
22  
23  
24  
25  
26  
27  
28  
29  
30  
31  
32  
33  
34  
35  
36  
37  
38  
39  
40  
41  
42  
43  
44  
45  
46  
47  
48  
49  
50  
51  
52  
53  
54  
55  
56  
57  
58  
59  
60

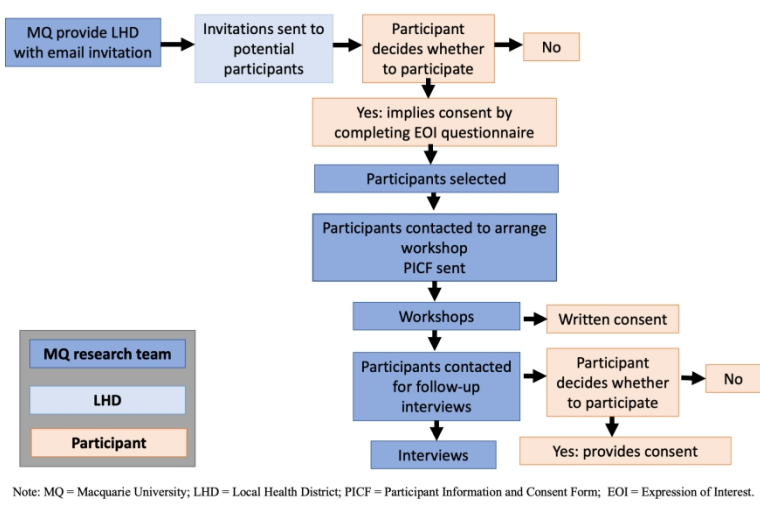

Figure 2: Recruitment process map  
338x190mm (225 x 225 DPI)

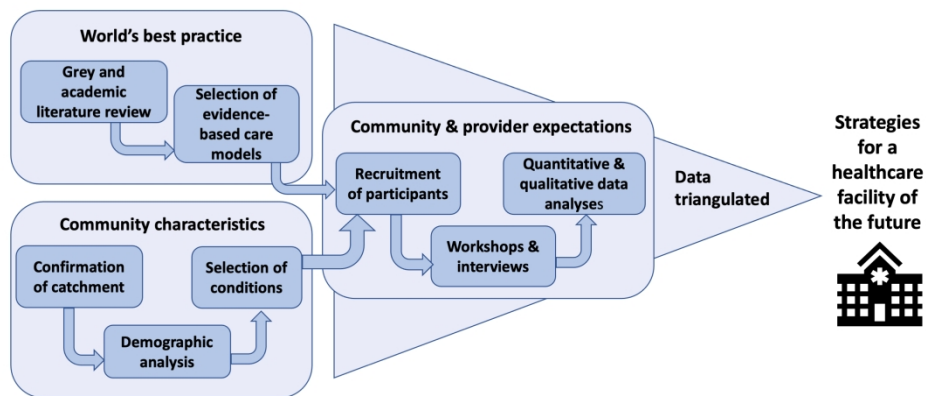

Figure 3: Recruitment process and data plan for the project

338x190mm (225 x 225 DPI)

### Consumer: General Welcome

“Thank you for coming along today and participating in our study. My name is XXX.

Acknowledgement of Country

Bathrooms, fire exits.

The purpose of this workshop is to capture the needs of the Rouse Hill community and their perspectives on new ways of delivering acute care. What we talk about today will inform the development of the new hospital in Rouse Hill. We really appreciate your time and thank you very much for being here today.

**Consumer stream:** As consumers of healthcare, your experiences as patients are very valuable. However, please note that there is no obligation to disclose details of personal healthcare issues.

Throughout the workshop a researcher/facilitator will be with each table group to take notes, facilitate discussion and ask you questions. The workshop will go for 2 hours with a 10-minute break with refreshments after the first hour.”

Audio-recording devices, flipcharts, and notes will be used to capture discussions. You will remain unidentifiable in the analysis and write-up of any findings relating to this research.

If you have any questions throughout the day, please ask one of the Macquarie University staff members (**introduce all staff members**).

Before we begin, we ask that you read and sign the PICF on your tables. If you have any questions before signing, now is the time to ask (**pause for questions**). Once you’ve signed, we will photocopy the documents and provide you with your own version.”

### Group Introduction

“Good afternoon (morning/evening etc.) and welcome to the workshop. Thanks for taking the time to talk with us about what you would like to see in the new Rouse Hill Hospital. My name is (**insert name here**), and I am from the Australian Institute of Health Innovation at Macquarie University. We are working in partnership with Health Infrastructure and the Western Sydney Local Health District. My role as moderator will be to guide the discussion today.

Please note that there are no right or wrong answers but rather differing points of view. Please feel free to share your point of view even if it differs from what others have said. You don't need to agree with others' opinions, but we ask that you listen respectfully as others share their views.

You've probably noticed the microphone. We are taping the session because we don't want to miss any of your comments. People often say very helpful things in these discussions, and we can't write fast enough to get them all down. However, to make the recording as clear as possible, we ask that only one person speak at a time. And to remind you, no-one is identifiable on the recording.

Let's get started! Before we begin, if you wouldn't mind writing your name on the (name card/sticker in front of you. We will be on a first name basis today, but we won't use any names in our reports."

### **Icebreaker Activity**

"To get everyone thinking, we have planned a brief icebreaker activity. The purpose of this activity is to encourage thinking outside of the box.

- As a group, let's try to come up with 15 different ways that you can use a paperclip. The more inventive, the better. Who would like to start? We have 3 minutes!

(Separate sheet of paper)

Please rate on the scale below the following:

#### **1. How comfortable are you using:**

##### **A smart phone?**

Extremely Uncomfortable, Somewhat Uncomfortable, Neutral, Somewhat Comfortable, Extremely Comfortable

##### **A smart watch?**

Extremely Uncomfortable, Somewhat Uncomfortable, Neutral, Somewhat Comfortable, Extremely Comfortable

##### **Computers?**

Extremely Uncomfortable, Somewhat Uncomfortable, Neutral, Somewhat Comfortable, Extremely Comfortable

"Now that we have gotten to know each other a little better we would like you to reflect on a patient or patients who may or may not benefit from different "models of care". Today, we will talk about three different models of care in our workshop today. These are not the only models of care we are exploring, but we only have two hours, so will be talking about different models with different groups. We are interested in your ideas and would like you to reflect broadly as well as on



1  
2  
3 your experience as a person who may or may not benefit from these three different “models of  
4 care”.

5  
6  
7  
8 **Model 1: Ambulatory Care and diagnostic hospitals:** Non-admitted services, where patient  
9 care does not involve an overnight stay and usually involves diagnosis and treatment on the  
10 same day.

11  
12  
13 SHOW images: Home vs. Hospital (Images 1/2)  
14 Maria (Image 3)

15  
16  
17 Your name is Maria and you are a 45 year old patient who is able to walk unaided and travels to a  
18 centre for treatment 2-3 times per week (e.g., renal dialysis in a shopping centre, chemotherapy)

19  
20  
21 **We would like to ask questions from Maria’s as well as your own perspective. Let’s start with**  
22 **Maria:**

23  
24  
25 **From Maria’s perspective:**

- 26  
27 **1. What is good about this model for Maria?**  
28  
29 **2. What about this model might make it difficult for Maria?**

30  
31  
32 *Additional prompts*

33 Can you think of anything about it that might be impractical?

34 Can you think of anything about it that might be unachievable?

- 35  
36  
37  
38  
39 **3. What needs to be in place for this to work for Maria?**

40  
41  
42 **For example, systems, processes, people, skills and equipment?**

43 **Now from your perspective:**

- 44  
45 **4. What about this model might be good for you and your family?**  
46  
47 **5. What about this model might make it difficult for you and your family?**

48  
49  
50 *Additional prompts*

51 Can you think of anything about it that might be impractical?

52 Can you think of anything about it that might be unachievable?

- 53  
54  
55  
56  
57 **6. How easy is this to use for you?**  
58  
59  
60

1  
2  
3 **7. What would stop you using it?**  
4

5  
6 **8. Can you think of other people who would have difficulty using this model?**  
7

8  
9 **9. We have already asked for Maria but what other things needs to be in place for this to**  
10 **work for you?**  
11

12 **For example systems, processes, people, skills and equipment**  
13

14  
15  
16 **General questions:**  
17

18  
19 **10. Is there anything about the model that concerns you?**

20 **11. Can you see any safety issues for yourself?**

- 21  
22  Why is that?  
23  
24  *Can you suggest a better way?*  
25

26  
27 *(Additional prompts)*  
28

29 *Are there any potential risks that you can identify?*

30 **12. What other illness and injuries might this model work for?**  
31  
32

33  
34  
35 **Model 2: Digital Hospitals/Consumer Focused Care**  
36

37 Hospitals that make extensive use of new technologies to provide streamlined care, improve  
38 patient safety and care quality, and improve overall care cost effectiveness.  
39

40  
41 SHOW images: Home vs. Hospital (Images 1/2)

42 John (Image 4)  
43

44  
45 John is an 70-year-old man who has a heart condition that causes dizziness (e.g., irregular  
46 heartbeat). As this places him at a high risk of falls, he has been admitted to hospital for monitoring.  
47 Beside his bed is a digital matt that detects and alerts the staff if he has had a fall.  
48  
49

50  
51 Repeat questions  
52

53  
54  
55 **Model 3: Hospital in the Home**  
56  
57  
58  
59  
60

1  
2  
3 Patient care and consultation which is typically delivered in the hospital settings is delivered  
4 to patients in their own home (e.g., intravenous therapy (antibiotics), anticoagulation, wound  
5 care, and chemotherapy).  
6  
7

8  
9  
10 SHOW images: Home vs. Hospital (Images 1/2)

11 Jenny (Image 5)

12 Jenny is a 35-year-old, single mother of three who developed a breast infection with an abscess  
13 following the birth of her baby. She was treated with intravenous antibiotics (on a drip) and a tube  
14 was placed into her breast to drain the infected fluid. After 24 hours, she returned home to her  
15 children and is provided wound care and support in her home from a visiting nurse.  
16  
17

18  
19  
20 Repeat questions  
21  
22

23 **At end of focus group**

24 **Concluding remarks:** Now that we have come to the end of the workshop, we'd like to ask you:  
25  
26

27  
28 **How important is it for you to be able to choose a model of care?**

29 Prompt: What if you have no option to choose? (only use if needed)  
30  
31

32  
33 **From your perspective, please rate your preference for each model:** (Note: Models X, Y, and Z will  
34 be replaced with the relevant models discussed at each workshop).  
35  
36

|         |         |                  |         |    |
|---------|---------|------------------|---------|----|
| 37      | 38      | 39               | 40      | 41 |
| Model X | No pref | Neither suitable | Model Y |    |
| Model Y | No pref | Neither suitable | Model Z |    |
| Model Z | No pref | Neither suitable | Model X |    |
| 42      | 43      | 44               | 45      | 46 |

47 Is there anything else you would like to communicate to us about the new hospital?  
48  
49

50 **Concluding remarks:**

51 We will be looking at your data to find commonalties between consumers.  
52

53 We are conducting exploratory research to gather information only, and all models may not be  
54 implemented. Thank you for your time.  
55  
56

57  
58 **Note: All images were publicly available and downloaded from Google.**  
59  
60

### Provider: General Welcome

“Thank you for coming along today and participating in our study. My name is XXX.

Acknowledgement of Country

Bathrooms, fire exits.

The purpose of this workshop is to capture the needs of the Rouse Hill community and their perspectives on new ways of delivering acute care. What we talk about today will inform the development of the new hospital in Rouse Hill. We really appreciate your time and thank you very much for being here today.

As providers of healthcare, your experiences as patients are very valuable. However, please note that there is no obligation to disclose details of personal healthcare issues.

Throughout the workshop a researcher/facilitator will be with each table group to take notes, facilitate discussion and ask you questions. The workshop will go for 2 hours with a 10-minute break with refreshments after the first hour.

Audio-recording devices, flipcharts, and notes will be used to capture discussions. You will remain unidentifiable in the analysis and write-up of any findings relating to this research.

If you have any questions throughout the day, please ask one of the Macquarie University staff members (**introduce all staff members**).

Before we begin, we ask that you read and sign the PICF on your tables. If you have any questions before signing, now is the time to ask (**pause for questions**). Once you’ve signed, we will photocopy the documents and provide you with your own version.”

### Individual Group Introduction

1  
2  
3 “Good afternoon (morning/evening etc.) and welcome to the workshop. Thanks for taking the time  
4 to talk with us about what you would like to see in the new Rouse Hill Hospital. My name is (**insert**  
5 **name here**), and I am from the Australian Institute of Health Innovation at Macquarie University. We  
6 are working in partnership with Health Infrastructure and the Western Sydney Local Health District.  
7  
8 My role as moderator will be to guide the discussion today.  
9  
10

11  
12 Please note that there are no right or wrong answers but rather differing points of view. Please feel  
13 free to share your point of view even if it differs from what others have said. You don’t need to  
14 agree with others’ opinions, but we ask that you listen respectfully as others share their views.  
15  
16

17  
18 You’ve probably noticed the microphone. We are taping the session because we don’t want to miss  
19 any of your comments. People often say very helpful things in these discussions, and we can’t write  
20 fast enough to get them all down. However, to make the recording as clear as possible, we ask that  
21 only one person speak at a time. And to remind you, no-one is identifiable on the recording.  
22  
23

24  
25 Let’s get started! Before we begin, if you wouldn’t mind writing your name on the (name  
26 card/sticker in front of you. We will be on a first name basis today, but we won’t use any names in  
27 our reports.”  
28  
29

30  
31  
32 (Separate sheet of paper)  
33

34 Please rate on the scale below the following:  
35

36 **2. How comfortable are you using:**  
37  
38

39 **A smart phone?**  
40

41 Extremely Uncomfortable, Somewhat Uncomfortable, Neutral, Somewhat Comfortable, Extremely Comfortable  
42  
43

44 **A smart watch?**  
45

46 Extremely Uncomfortable, Somewhat Uncomfortable, Neutral, Somewhat Comfortable, Extremely Comfortable  
47  
48

49 **Computers?**  
50

51 Extremely Uncomfortable, Somewhat Uncomfortable, Neutral, Somewhat Comfortable, Extremely Comfortable  
52  
53

54 **3. What proportion of your patients would be comfortable using:**  
55  
56

57 **A smart phone?**  
58

59 Extremely Uncomfortable, Somewhat Uncomfortable, Neutral, Somewhat Comfortable, Extremely Comfortable  
60

1  
2  
3 **A smart watch?**  
4

5 Extremely Uncomfortable, Somewhat Uncomfortable, Neutral, Somewhat Comfortable, Extremely Comfortable  
6

7 **Computers?**  
8

9 Extremely Uncomfortable, Somewhat Uncomfortable, Neutral, Somewhat Comfortable, Extremely Comfortable  
10  
11

12 **4. So that we can understand you a bit better, what is your discipline?**

13 **5. Are you mostly:**

14 Office based, facility based, a combination of both?  
15  
16

17 **6. What main problems do you currently encounter around delivering high quality care?**

18 **7. Can you suggest ways to overcome? (5 minutes)**

19 **8. What are you looking for in a new hospital?**

20 For example: IT/Scheduling/Accessibility  
21  
22  
23

24  
25  
26  
27  
28 “Now that we have gotten to know each other a little better we would like you to reflect on a  
29 patient or patients who may or may not benefit from different “models of care”. Today, we will talk  
30 about three different models of care in our workshop today. These are not the only models of care  
31 we are exploring, but we only have two hours, so will be talking about different models with  
32 different groups. We are interested in your thoughts about each of these models of care from your  
33 perspective and your patients’ perspective. Some of these scenarios describe models you may have  
34 already encountered or engaged with. We would like you to think broadly.”  
35  
36  
37

38 **Model 1:**

39 Maria is a 65 year old patient who is ambulant and travels to a facility for routine care 2-3 times per  
40 week (e.g., renal dialysis, chemotherapy)  
41

42 Please answer the following questions:  
43

44 **1. In an ideal world, how would her care be delivered?**

45 *Additional prompt:* how could you best model this?  
46  
47  
48

49 **Model 1: Ambulatory Care and diagnostic hospitals**

50 Non-admitted services, where patient care does not involve an overnight stay and usually  
51 involves diagnosis and treatment on the same day.  
52  
53  
54

55 **From your perspective:**  
56

57 **2. How would this model help to solve the big problems for you?**  
58 **(What are the pros/strengths for you?)**  
59  
60

- 1  
2  
3  
4 **3. What barriers limit this model for you?**  
5  
6 **4. What enablers would need to be in place for this to work?**  
7  
8  
9

10  
11  
12 **From your patients' perspective:**  
13

- 14 **5. How would this model help to solve the big problems for your patients?**  
15  
16 **6. What might be the pros/strengths?**  
17  
18 **7. What barriers might limit this model for your patients?**  
19  
20 **8. What enablers would need to be in place for this to work?**  
21  
22

23  
24  
25 **General questions:**  
26

- 27  
28 **9. What proportion of your patients would this model work for?**  
29

30  
31 Low – Mid – High  
32

- 33 **10. Can you think of anything about it that might be impractical?**  
34  
35  
36 **11. Can you think of anything about it that might be unachievable?**  
37  
38  
39 **12. To what extent could this model be applicable to other health conditions? What**  
40 **conditions?**  
41  
42  
43 **13. Can you think of any clinicians or patients who might find this model of care difficult to**  
44 **access?**  
45  
46  
47  
48 **14. Is there anything about the model that concerns you?**  
49  
50  
51  
52 **15. What might be the safety issues for your patients?**  
53  
54  
55  
56 **16. Do you see any risks to you as the healthcare provider?**  
57  
58  
59  
60

1  
2  
3 (Additional prompts)  
4

5 Are there any potential risks that you can identify?

- 6 ○ "Why is that?"  
7  
8 ○ Can you suggest a better way?  
9

10  
11  
12  
13 **Model 2:**

14 You are in a place you usually work at, and the facility has digital technology in place such as  
15 intravenous fluid charts, bed sensors to alert staff that a patient needs moving in bed, floor mats  
16 that alert staff when patients are out of bed, and interactive monitors for patients and staff about  
17 daily schedules.  
18  
19

20  
21 **Model 2: Digital Hospitals/Consumer Focused Care**

22 Hospitals that make extensive use of new technologies to provide streamlined care, improve  
23 patient safety and care quality, and improve overall care cost effectiveness.  
24  
25

26  
27  
28  
29 Repeat questions  
30

31  
32  
33 **Model 3:**

34 Your patient has undergone a procedure or surgery and after treatment in the hospital is discharged  
35 home for follow-up care. For example: Jenny is a 35-year-old, single mother of three who developed  
36 complicated mastitis with an abscess following the birth of her baby. She was treated with  
37 intravenous antibiotics and a drain was placed into the abscess. After 24 hours, she returned home  
38 to her children and is provided wound care and support from a nurse.  
39  
40  
41  
42

43  
44  
45 **Model 3: Hospital in the Home**

46 Patient care and consultation which is typically delivered in the hospital settings is delivered  
47 to patients in their own home (e.g., intravenous therapy (antibiotics), anticoagulation, wound  
48 care, and chemotherapy).  
49  
50

51  
52  
53 Repeat questions  
54

55  
56 **At end of focus group**  
57  
58  
59  
60



1  
2  
3 **Thinking broadly, from your perspective, please rate your preference for each model:** (Note:  
4 Models X, Y, and Z will be replaced with the relevant models discussed at each workshop).  
5  
6  
7

|            |         |                  |         |
|------------|---------|------------------|---------|
| 8 Model X  | No pref | Neither suitable | Model Y |
| 9 Model Y  | No pref | Neither suitable | Model Z |
| 10 Model Z | No pref | Neither suitable | Model X |

11  
12  
13  
14  
15 **Thinking broadly, from your patients' perspective, please rate your preference for each model:**  
16 (Note: Models X, Y, and Z will be replaced with the relevant models discussed at each workshop).  
17  
18

|            |         |                  |         |
|------------|---------|------------------|---------|
| 19 Model X | No pref | Neither suitable | Model Y |
| 20 Model Y | No pref | Neither suitable | Model Z |
| 21 Model Z | No pref | Neither suitable | Model X |

22  
23  
24  
25  
26 **Concluding remarks:**

27 We will be looking at your data to find commonalties between providers.

28 We are conducting exploratory research to gather information only, and all models may not be  
29 implemented. Thank you for your time.  
30  
31  
32  
33  
34  
35  
36  
37  
38  
39  
40  
41  
42  
43  
44  
45  
46  
47  
48  
49  
50  
51  
52  
53  
54  
55  
56  
57  
58  
59  
60

1  
2  
3  
4  
5  
6  
7  
8  
9  
10  
11  
12  
13  
14  
15  
16  
17  
18  
19  
20  
21  
22  
23  
24  
25  
26  
27  
28  
29  
30  
31  
32  
33  
34  
35  
36  
37  
38  
39  
40  
41  
42  
43  
44  
45  
46  
47  
48  
49  
50  
51  
52  
53  
54  
55  
56  
57  
58  
59  
60

For peer review only

# BMJ Open

## Innovative models of care for the health facility of the future: a protocol for a mixed-methods study to elicit consumer and provider views

|                                 |                                                                                                                                                                                                                                                                                                                                                                                                                                                                                                                                                                                                                                                                                                                                                                                                                                                                                                                                                                                                                                                                                                                                                                                                                                                       |
|---------------------------------|-------------------------------------------------------------------------------------------------------------------------------------------------------------------------------------------------------------------------------------------------------------------------------------------------------------------------------------------------------------------------------------------------------------------------------------------------------------------------------------------------------------------------------------------------------------------------------------------------------------------------------------------------------------------------------------------------------------------------------------------------------------------------------------------------------------------------------------------------------------------------------------------------------------------------------------------------------------------------------------------------------------------------------------------------------------------------------------------------------------------------------------------------------------------------------------------------------------------------------------------------------|
| Journal:                        | <i>BMJ Open</i>                                                                                                                                                                                                                                                                                                                                                                                                                                                                                                                                                                                                                                                                                                                                                                                                                                                                                                                                                                                                                                                                                                                                                                                                                                       |
| Manuscript ID                   | bmjopen-2021-059330.R1                                                                                                                                                                                                                                                                                                                                                                                                                                                                                                                                                                                                                                                                                                                                                                                                                                                                                                                                                                                                                                                                                                                                                                                                                                |
| Article Type:                   | Protocol                                                                                                                                                                                                                                                                                                                                                                                                                                                                                                                                                                                                                                                                                                                                                                                                                                                                                                                                                                                                                                                                                                                                                                                                                                              |
| Date Submitted by the Author:   | 07-Sep-2022                                                                                                                                                                                                                                                                                                                                                                                                                                                                                                                                                                                                                                                                                                                                                                                                                                                                                                                                                                                                                                                                                                                                                                                                                                           |
| Complete List of Authors:       | Carrigan, Ann; Macquarie University, Australian Institute of Health Innovation<br>Roberts, Natalie; Macquarie University<br>Clay-Williams, Robyn; Macquarie University<br>Hibbert, Peter; Macquarie University<br>Pomare, Chiara; Macquarie University, Australian Institute of Health Innovation, Centre for Healthcare Resilience and Implementation Science<br>Mahmoud, Zeyad; Australian Institute of Health Innovation, Faculty of Medicine & Health Science, Macquarie University, NSW, Australia; Universite de Nantes, LEMNA,F-44000<br>Maka, Katherine; Western Sydney Local Health District<br>Mitchell, Rebecca; Macquarie University, Australian Institute of Health Innovation<br>Zurynski, Yvonne; Macquarie University, Australian Institute of Health Innovation<br>Long, Janet; Australian Institute of Health Innovation, Australian Institute of Health Innovation<br>Rapport, Frances ; Macquarie University, Australian Institute of Health Innovation<br>Arnolda, Gaston; Macquarie University Faculty of Medicine and Health Sciences, Australian Institute of Health Innovation<br>Loy, Graeme; Western Sydney Local Health District<br>Braithwaite, Jeffrey; Macquarie University, Australian Institute of Health Innovation |
| <b>Primary Subject Heading</b>: | Health services research                                                                                                                                                                                                                                                                                                                                                                                                                                                                                                                                                                                                                                                                                                                                                                                                                                                                                                                                                                                                                                                                                                                                                                                                                              |
| Secondary Subject Heading:      | Public health, Patient-centred medicine                                                                                                                                                                                                                                                                                                                                                                                                                                                                                                                                                                                                                                                                                                                                                                                                                                                                                                                                                                                                                                                                                                                                                                                                               |
| Keywords:                       | Organisation of health services < HEALTH SERVICES ADMINISTRATION & MANAGEMENT, Organisational development < HEALTH SERVICES ADMINISTRATION & MANAGEMENT, Protocols & guidelines < HEALTH SERVICES ADMINISTRATION & MANAGEMENT                                                                                                                                                                                                                                                                                                                                                                                                                                                                                                                                                                                                                                                                                                                                                                                                                                                                                                                                                                                                                         |
|                                 |                                                                                                                                                                                                                                                                                                                                                                                                                                                                                                                                                                                                                                                                                                                                                                                                                                                                                                                                                                                                                                                                                                                                                                                                                                                       |

1  
2  
3  
4  
5  
6  
7  
8  
9  
10  
11  
12  
13  
14  
15  
16  
17  
18  
19  
20  
21  
22  
23  
24  
25  
26  
27  
28  
29  
30  
31  
32  
33  
34  
35  
36  
37  
38  
39  
40  
41  
42  
43  
44  
45  
46  
47  
48  
49  
50  
51  
52  
53  
54  
55  
56  
57  
58  
59  
60

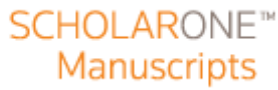

1  
2  
3 **Innovative models of care for the health facility of the future: a protocol for a mixed-**  
4 **methods study to elicit consumer and provider views**  
5  
6  
7

8 Ann Carrigan<sup>1,2</sup>, Natalie Roberts<sup>1</sup>, Robyn Clay-Williams<sup>1</sup>, Peter Hibbert<sup>1,3</sup>, Chiara Pomare<sup>1</sup>,  
9 Zeyad Mahmoud<sup>1</sup>, Katherine Maka<sup>4</sup>, Rebecca Mitchell<sup>1</sup>, Yvonne Zurynski<sup>1</sup>, Janet Long<sup>1</sup>,  
10 Frances Rapport<sup>1</sup>, Gaston Arnolda<sup>1</sup>, Graeme Loy<sup>4</sup>, Jeffrey Braithwaite<sup>1</sup>  
11  
12  
13  
14  
15  
16

17 <sup>1</sup> Australian Institute of Health Innovation, Centre for Healthcare Resilience and  
18 Implementation Science, Macquarie University, Sydney, New South Wales, Australia  
19

20 <sup>2</sup>Centre for Elite Performance, Expertise & Training,  
21 Macquarie University, Sydney, NSW, Australia.  
22

23 <sup>3</sup>IMPACT in Health, Allied Health and Human Performance, University of South Australia,  
24 Adelaide, Australia.  
25

26 <sup>4</sup>Western Sydney Local Health District, Sydney, New South Wales, Australia  
27  
28  
29  
30  
31  
32  
33  
34  
35  
36  
37  
38  
39  
40  
41  
42  
43  
44  
45  
46

47 **Correspondence to:**

48 Robyn Clay-Williams

49 [robyn.clay-williams@mq.edu.au](mailto:robyn.clay-williams@mq.edu.au)  
50

51 Peter Hibbert

52 [peter.hibbert@mq.edu.au](mailto:peter.hibbert@mq.edu.au)  
53  
54  
55  
56  
57  
58  
59  
60

1  
2  
3 Word count: 4580  
4

5 **ABSTRACT**  
6

7 **Introduction:** To address the challenges of rapidly changing healthcare, governments and  
8 health services are increasingly emphasising healthcare delivery models that are flexible,  
9 person-centred, cost-effective and integrate hospital services more closely with primary  
10 healthcare and social services. In addition, such models increasingly embed consumer co-  
11 design, integration of services, and leverage digital technologies such as telehealth and  
12 sophisticated medical records systems.  
13  
14

15 **Objectives:** This paper provides a study protocol to describe a method to elicit consumer and  
16 healthcare provider needs and expectations for the development of innovative care models.  
17  
18

19 **Methods and analysis:** A literature review identified six key models of care, supported by a  
20 common theme of consumer focused care, along with the international evidence supporting  
21 the efficacy of these models. A mixed-methods study of the needs and expectations of  
22 consumer members and health providers who reside or work in the area of a new hospital  
23 catchment will be undertaken. They will complete a community- and provider-specific, short  
24 demographic questionnaire (delivered during the recruitment process) and be assigned to  
25 facilitator-coordinated, online workshops comprising small focus groups. Follow-up  
26 interviews will be offered. Culturally and linguistically diverse members and Aboriginal and  
27 Torres Strait Islander Elders and their communities will also be consulted. Data will be  
28 analysed thematically (qualitative) and statistically (quantitative), and findings synthesised  
29 using a triangulated approach.  
30  
31  
32  
33  
34  
35  
36  
37  
38  
39  
40  
41  
42  
43  
44  
45  
46  
47  
48  
49

50 **Ethics and dissemination:** The results will be actively disseminated through peer-reviewed  
51 journals, conference presentations and in a report to stakeholders. This study was reviewed  
52 and approved by the relevant Ethics Committee in New South Wales, Australia.  
53  
54  
55  
56  
57  
58  
59  
60

### Strengths and limitations of this study

- The study will be the first of its kind to identify the key evidence-based, innovative models of health care, considering the benefits and implementation considerations for each model, as perceived by consumers and healthcare providers.
- The study design is developed in collaboration with the Local Health District where the health facility will be located.
- A key strength of the study is the use of mixed-methods and the triangulation of data from multiple sources.
- A key limitation of the study is that the structure of workshops focused on specific scenarios which may not be generalisable.

Peer review only

## BACKGROUND

1  
2  
3  
4  
5  
6  
7  
8  
9  
10  
11  
12  
13  
14  
15  
16  
17  
18  
19  
20  
21  
22  
23  
24  
25  
26  
27  
28  
29  
30  
31  
32  
33  
34  
35  
36  
37  
38  
39  
40  
41  
42  
43  
44  
45  
46  
47  
48  
49  
50  
51  
52  
53  
54  
55  
56  
57  
58  
59  
60

Around the world, the delivery of quality hospital care is transforming in response to the availability of new and enhanced technologies and increasing demand for care.[1] Challenges to extant healthcare systems include an increase in the proportion of older adults in the population[2-4] that will redirect the focus of health towards long-term and chronic care.[3] Increased demand on the healthcare system comes from multiple sources, including higher prevalence of chronic diseases such as obesity, kidney failure[5] and cognitive decline.[3] The shift to patient-centred healthcare models[3] will also have resource implications while aiming for improvements in patient and staff satisfaction and quality of care.[6] To address the growing challenges globally, health services and governments are experimenting with more cost-effective care alternatives often delivered outside hospitals walls,[7] prioritising greater consumer engagement[8, 9] and investing in digitised care services.[10] Digital services have the potential to support more personalised care, integrated with existing models, and delivered remotely (e.g., telemedicine). Additionally, advanced technologies such as robotics, artificial intelligence (AI) and big data analytics may provide more seamless and efficient care.[4]

In 2018, Braithwaite and colleagues identified key trends shaping the health systems of the future: global demographic dynamics, work in creating sustainable health systems, evolving technologies such as genomics and AI, and new models of care. New models of care are emerging to meet new circumstances. For example, the COVID-19 global health pandemic in 2020 acted as a catalyst or trigger for change (e.g., rapid adoption of telehealth) that have been called for previously by those who suffer chronic conditions[11]. E-health, telehealth and virtual care models allowed patients to remain socially distant rather than having physical contact with the community and health services, simultaneously reducing the risk of the virus



1  
2  
3 spreading among patients and healthcare providers.[12] These innovative models take a novel  
4  
5 approach to provide high quality and safe care in and out of hospital settings.[13]  
6

7  
8 In Australia, the New South Wales (NSW) government announced funding for a new health  
9  
10 facility at Rouse Hill. The Western Sydney Local Health District (LHD) is planning the new  
11  
12 health facility and is seeking innovative ways of delivering care that are more accessible,  
13  
14 efficient, and effective for healthcare providers, funders and the population. In consultation  
15  
16 with our research team, it was believed that there was an opportunity to create a different  
17  
18 kind of facility – a modern and digitally-enabled capability. Seeking views from consumers  
19  
20 and providers will ensure that the way the facility provides services is deeply connected to  
21  
22 community needs. These include physical, health and psychosocial needs; rapid access to  
23  
24 care for consumers; and adequate resources and infrastructure for providers.  
25  
26

27  
28 The goal of this project is to provide a research-based approach to develop an innovative  
29  
30 health facility and health service; one that delivers a high-quality care solution for the  
31  
32 community rather than simply establishing more hospital beds, departments, units, and wards.  
33  
34 Realising this vision will have far-reaching implications for the design and delivery of health  
35  
36 services in the future. But to develop any new model for integrating community and hospital  
37  
38 acute care and support services, we need to turn to the community and health care providers  
39  
40 to understand their expectations and the healthcare needs that may be met by innovative  
41  
42 models of care. While we are gaining data to inform the construction and design of a  
43  
44 “hospital”, we use the term “health facility” to reflect blue sky thinking and avoid being  
45  
46 constrained by language that implies a large conglomeration of buildings and beds.  
47  
48  
49

### 50 51 **Identifying evidence-based models of care**

52  
53 Before eliciting consumers’ and providers’ needs and expectations, we needed to assess the  
54  
55 evidence to identify candidate models of care. We therefore undertook a grey literature  
56  
57  
58  
59  
60

1  
2  
3 review to identify potential models of care, followed by an academic review of the  
4  
5 international evidence supporting the efficacy of these models.  
6

7  
8 The grey literature review involved an advanced search using Google and included websites  
9  
10 such as World Health Organization and Organization for Economic Co-operation and  
11  
12 Development (OECD) using search terms such as “future hospital”. Two reviewers  
13  
14 completed a title and abstract screen and three reviewed the full-text documents. Eighty-five  
15  
16 documents were included, comprising 55 reports, 17 online newspaper articles, 10 articles or  
17  
18 bulletins from organisation websites, two online articles and an opinion piece. From this  
19  
20 review, six key themes were deductively determined that were used to group innovative  
21  
22 models of health care. Consumer focused care, where during planning, delivery, and  
23  
24 evaluation, consumers, carers, and families are placed at the centre of care was a common  
25  
26 theme that underpinned the other six models. For example, individualised self-management  
27  
28 support in early chronic kidney disease transition of care plan from hospital to home  
29  
30 involving a multidisciplinary team.[5] As such, only six models will be presented, each  
31  
32 incorporating consumer-focused care (see Table 1). Benefits, drawbacks, and past  
33  
34 implementation of the models were also identified.  
35  
36  
37  
38  
39

40 The Preferred reporting Items for Systematic Reviews (PRISMA) was used to guide the  
41  
42 academic literature review to extract the evidence-based support for the models of care  
43  
44 identified in the grey literature.[14] Search strings chosen from prevalence data of the focal  
45  
46 community in the context of the models were applied to three academics databases  
47  
48 (PsychINFO, Ovid MEDLINE, and CINAHL). For example, “virtual hospital” AND “cardiac  
49  
50 arrest”. Sixteen reviewers (eight pairs) completed a title and abstract screen and subsequently  
51  
52 reviewed the full-text documents. Given the large numbers of papers resulting from the  
53  
54 searches (i.e., over 200,000 results), the researchers confined the searches to review papers  
55  
56  
57  
58  
59  
60

only. Sixty-one peer-reviewed, English language review studies with human subjects, dated 2016-2021, met the criteria for inclusion. This review will be reported separately.

Table 1: Six evidence-based innovative models of care

| <b>Model</b>                             | <b>Description</b>                                                                                                                                                       | <b>Example</b>                                                                                                   |
|------------------------------------------|--------------------------------------------------------------------------------------------------------------------------------------------------------------------------|------------------------------------------------------------------------------------------------------------------|
| Ambulatory care and diagnostic hospitals | Non-admitted services, where patient care does not involve an overnight stay and usually involves diagnosis and treatment on the same day.                               | Same day joint arthroplasty[15]                                                                                  |
| Digital hospitals                        | Hospitals that make extensive use of new technologies to provide streamlined care, improve patient safety and care quality, and improve overall care cost effectiveness. | Machine learning algorithm for prediction of post-total hip arthroplasty complications[16]                       |
| Hospital in the home                     | Some or all of patient care and consultation which is typically delivered in the hospital settings is delivered to patients in their own home.                           | Early discharge hospital at home care for chronic obstructive airways disease managed by a community service[17] |

|                                                                                        |                                                         |                                                                                                                                                                                                      |                                                          |
|----------------------------------------------------------------------------------------|---------------------------------------------------------|------------------------------------------------------------------------------------------------------------------------------------------------------------------------------------------------------|----------------------------------------------------------|
| 1<br>2<br>3<br>4<br>5<br>6<br>7<br>8<br>9<br>10<br>11<br>12                            | Integrated care                                         | Multidimensional needs of the patient are delivered in a coordinated manner by an interdisciplinary team or network of healthcare professionals                                                      | Orthogeriatric fracture service[18]                      |
| 13<br>14<br>15<br>16<br>17<br>18<br>19                                                 | Virtual care                                            | Patient care and consultation delivered through telephone or video communication.                                                                                                                    | Telehealth management in patients with heart failure[19] |
| 20<br>21<br>22<br>23<br>24<br>25<br>26<br>27<br>28<br>29<br>30<br>31<br>32<br>33<br>34 | Specialist hospitals and population specific care units | Specialist hospitals provide selective care services for targeted patient groups. Population-specific care units are pathways within general hospitals dedicated to treatment of specific conditions | Comprehensive cancer centres[20]                         |

## METHODS

### Study Aim

The study aims to elicit health consumers' and healthcare providers' needs drawn from the local community and expectations of a new health facility, and how these needs may be met through the delivery of innovative models of care.

### Study Design

We will conduct a mixed-methods study of consumer and provider needs and expectations in relation to innovative models of care delivery for a new health facility. As illustrated in Figure 1, the design comprises collections of consumer and provider data via a short expression of interest (EOI) questionnaire comprising demographic information (as part of the recruitment process), facilitator-coordinated workshops, and supplementary interviews.

1  
2  
3 Data collection will occur in a sequential manner, where results from the EOI questionnaire  
4 will inform workshop design. In addition, interview design and recruitment will be informed  
5 by the learnings from the workshops. Together, these methods of data collection will  
6 facilitate a varied and dynamic exploration of community and provider needs and  
7 expectations for innovative models of healthcare (see Figure 1).  
8  
9

10  
11  
12  
13  
14  
15 FIGURE 1 HERE  
16

### 17 18 19 **Study Setting**

20  
21 The project will be conducted online and in person. Specifically, the recruitment  
22 demographic questionnaire will be hosted and completed online. The face-to-face workshops  
23 will be held at public metropolitan hospitals and community centres in New South Wales  
24 (NSW), Australia. Participants will be provided with options to attend workshops during, or  
25 outside of working hours. For face-to-face workshops, we will follow all current COVID-19  
26 guidelines that are current at the time of data collection (e.g., social distancing, wearing of  
27 masks). In addition, the meeting format will be adjustable to being video-enabled to respond  
28 to any face-to-face restrictions in place associated with the COVID-19 pandemic.  
29  
30

31  
32  
33  
34  
35  
36  
37  
38  
39  
40  
41  
42  
43  
44  
45  
46  
47  
48  
49  
50  
51  
52  
53  
54  
55  
56  
57  
58  
59  
60  
Supplementary interviews with interested participants identified in the workshops will be  
conducted via an online platform such as Zoom or over the telephone for participant  
convenience.

The catchment area where a new health facility is currently being planned comprises a land  
area of almost 500 square kilometres and a population estimated in 2019 to be 300,000  
residents estimated in 2019. Between the 2006 and 2016 population censuses, the catchment  
experienced a population growth rate of 29% and this growth rate was predicted to rise when  
assessed using the 2021 census data.[21, 22] The 2016 Census reported that adults aged 35-  
44 years and school aged children aged 5-9 years were the largest age groups, 37% of the

1  
2  
3 population was born outside Australia and 0.9% identified as Aboriginal and/or Torres Strait  
4  
5 Islander.[23] As such, the workshops will include participants who self-identify with these  
6  
7 diverse populations.  
8

## 9 10 **Procedures**

### 11 12 *Recruitment:*

13  
14 Consumer members will include residents and patient representatives within the new health  
15  
16 facility catchment (49 suburbs) as defined by the LHD's planning team on 16<sup>th</sup> July 2021.  
17  
18 The participants will be recruited through the LHD's network and connections via email,  
19  
20 postings in local newspapers and through Facebook invitations. For providers, emails will be  
21  
22 sent by the LHD to potential participating providers such as healthcare professionals and  
23  
24 support staff via their established connections. These connections include, but are not limited  
25  
26 to, consumer networks, LHD community newsletters, migrant resources centres, the Primary  
27  
28 Health Network, and the Youth Advisory Council. To reach potential consumer participants  
29  
30 who may not have access to email or the internet, the invitation will also be posted in local  
31  
32 newspapers and advertised as flyers at LHD hospitals. For providers, emails will be  
33  
34 distributed via the LHD's Broadcast system, the Primary Health Network, and from the Chief  
35  
36 Executive Officer.  
37  
38  
39  
40

41  
42 As 37% of the consumers are from culturally and linguistically diverse (CALD) backgrounds,  
43  
44 non-English speaking participants will invited to participate in the study, aided by bi-lingual  
45  
46 interpreters from the LHD. The research materials comprising the invitation, EOI  
47  
48 questionnaire, workshop and interview scripts will be translated into the five most prevalent  
49  
50 non-English languages in the community - Hindi, Punjabi, Mandarin, Korean and Arabic.  
51  
52 For those accessing the research invitation electronically (via email or Facebook  
53  
54 advertisements), the invitation will include a link to an online EOI questionnaire using  
55  
56 REDCap electronic data capture tools.[24] The questionnaire will collect demographic data  
57  
58  
59  
60

1  
2  
3 including age, gender, location, ethnicity and contact information. The providers will be  
4  
5 asked to indicate their role and specialty, and the consumers will be asked for pertinent health  
6  
7 information such as whether they have a chronic health condition (Supplementary File 1).  
8

9  
10 Responses to the questionnaire will be taken as implied consent for collection of the  
11  
12 demographic information.  
13

14  
15 The provided contact information will be used to send the participant details about the  
16  
17 location and time of the workshops (either via phone or email – as selected by the  
18  
19 participant). For all participants who attend a workshop, we will ask for written informed  
20  
21 consent prior to commencement of the workshop. Participants will be sent the Participant  
22  
23 Information and Consent Form (PICF) prior to the workshop so that they can come prepared  
24  
25 with questions for the research team. Once participants sign the consent form, the research  
26  
27 staff will photocopy the PICF and provide a copy to each consenting participant. In the event  
28  
29 of delivering the workshops online, a link will be sent to the participants for access to the  
30  
31 PICF presented using REDCap tools.[24]  
32  
33

34  
35 After each workshop, those who express interest in an optional follow-up interview will be  
36  
37 contacted to confirm the findings. The PICF for the workshop informs participants that they  
38  
39 may be contacted after the workshop to be invited to a follow-up interview. Figure 2 provides  
40  
41 a map of the recruitment process for consumers and providers.  
42  
43  
44

45  
46 INSERT FIGURE 2 HERE  
47

#### 48 49 50 *Workshops:*

51  
52 There will be a total of 12 workshops across two streams of six: one stream for health  
53  
54 providers and another for consumer members. Two to four additional workshops will be held  
55  
56 for culturally and linguistically diverse (CALD) consumers and Aboriginal and Torres Strait  
57  
58 Islander consumers. Each workshop has been designed to elicit responses to the seven  
59  
60

1  
2  
3 models of care. To do this, we will divide participants into smaller parallel groups that each  
4  
5 will examine three models of care in detail, rather than present all seven models and induce  
6  
7 fatigue. The models have been counterbalanced across the eight workshops, to ensure that the  
8  
9 presentation and order of each model is balanced. There will be up to eight facilitators and  
10  
11 scribes at each workshop (a facilitator and scribe per group). Where needed, some groups  
12  
13 within the workshops will be supported by bi-lingual interpreters. The number of participants  
14  
15 in each workshop group has been designed based on our collective research experience as an  
16  
17 appropriate number for elicitation of the data we are seeking and is consistent with the  
18  
19 number of participants in focus groups where people feel relatively comfortable speaking to  
20  
21 others.[25]  
22  
23  
24  
25

26 The workshops will start with a short explanation by a research team lead, explaining that the  
27  
28 purpose of the workshop is to capture the needs of the consumers or providers and their  
29  
30 perspectives on innovative models of care delivery. They will then allocate the researchers  
31  
32 and participants to the groups. Within each group, the researchers will take notes, facilitate  
33  
34 discussion, and ask probing questions. Audio-recording devices and researcher notes will be  
35  
36 used to capture the content of discussions.  
37  
38  
39

40 After a brief icebreaker activity, the researchers will then ask questions to probe the  
41  
42 participants' digital literacy (e.g., "How comfortable are you using a  
43  
44 smartphone/smartwatch/computer?"). These questions are included as two of the models of  
45  
46 care presented (virtual care and digital hospitals) involve engagement with technology and  
47  
48 understanding the level of participant digital literacy will be important for interpreting the  
49  
50 findings. Workshop scenarios and questions have been designed around consumer focused  
51  
52 care and the six innovative models of care identified in the literature review in collaboration  
53  
54 with a clinical subject matter expert and co-author (KM) (Table 1). The priority conditions  
55  
56 used in the scenarios have been identified from the demographic data provided by the LHD  
57  
58  
59  
60



as the most common burdens of disease in the new health facility catchment and are listed below:

1. Cardiac arrest, chest pain, acute myocardial infarction, congestive heart failure.
2. Fractures, knee replacement, hip replacement, joint replacement, abnormal gait, bone disease, osteoporosis.
3. Abdominal pain, pelvic pain, gastrointestinal pain.
4. Pneumonia, asthma, chronic obstructive pulmonary disease.
5. Postnatal depression.
6. Dialysis (haemodialysis etc.), kidney disease, end-stage kidney disease.

Scenarios will be presented to participants for each model of care (see Table 2). Three of the six models along with the scenarios will be presented in each workshop, in counterbalanced order to minimise biases (e.g., 1 2 3, 4 5 6; 2 3 1, 5 6 4 etc.).

Table 2: Models of care and scenarios

| Model                                    | Scenario                                                                                                                                                                                                                                                                                       |
|------------------------------------------|------------------------------------------------------------------------------------------------------------------------------------------------------------------------------------------------------------------------------------------------------------------------------------------------|
| Ambulatory care and diagnostic hospitals | “Maria is a 45 year old woman who is able to walk unaided and travels to a centre for treatment 2-3 times per week (e.g., renal dialysis in a shopping centre, or chemotherapy).”                                                                                                              |
| Digital Hospital                         | “John is a 70-year-old man who has a heart condition that causes dizziness (e.g., irregular heartbeat). As this places him at a high risk of falls, he has been admitted to hospital for monitoring. Beside his bed is a digital matt that detects and alerts the staff if he has had a fall.” |

|                                                          |                                                                                                                                                                                                                                                                                                                                                                                                                                                                                                                                                                                                              |
|----------------------------------------------------------|--------------------------------------------------------------------------------------------------------------------------------------------------------------------------------------------------------------------------------------------------------------------------------------------------------------------------------------------------------------------------------------------------------------------------------------------------------------------------------------------------------------------------------------------------------------------------------------------------------------|
| Hospital in the Home                                     | <p>“Jenny is a 35-year-old, single mother of three who developed a breast infection with an abscess following the birth of her baby. She was treated with intravenous antibiotics (on a drip) and a tube was placed into her breast to drain the infected fluid. After 24 hours, she returned home to her children and is provided wound care and support in her home from a visiting nurse.”</p>                                                                                                                                                                                                            |
| Integrated Care                                          | <p>“Steve is a 50-year-old man with Type II diabetes who is obese and smokes a packet of cigarettes a day. He is having trouble walking so visits his local Emergency Department where he sees a General Practitioner (GP), who has a practice in an office next to the Emergency Department. The GP diagnoses a foot ulcer and identifies that Steve requires a full review of his care. Steve will be looked after in hospital by a multidisciplinary team of healthcare professionals (e.g., endocrinologist, ulcer team, nutritionist) using an electronic medical record system for communication.”</p> |
| Virtual Care                                             | <p>“Ivy is a 40-year-old woman who developed chest pain along with an irregular heartbeat following a dental procedure. She visited the local Emergency Department where no abnormality was found and was discharged. As she was still concerned about a sudden heart attack, she was fitted with a digital heart monitor with chest leads that talked to an application on her smart watch. Ivy was shown how to indicate an unusual heart event using her watch. Anytime Ivy tagged an event, the information was sent to a health care professional at the moment it happened.”</p>                       |
| Specialist hospitals and population specific care units: | <p>“Harrold is an 82-year-old man with mild dementia, who develops a urinary tract infection. He has been referred to a specialist dementia unit in a geriatric care</p>                                                                                                                                                                                                                                                                                                                                                                                                                                     |

|  |                                                                                                                                                                                               |
|--|-----------------------------------------------------------------------------------------------------------------------------------------------------------------------------------------------|
|  | ward at the local hospital. Harrold and his family are reassured that he will receive the highest level of evidence-based care for dementia from a specialised team of health professionals.” |
|--|-----------------------------------------------------------------------------------------------------------------------------------------------------------------------------------------------|

Following the presentation of each scenario, we will ask general questions about the model’s strengths and weaknesses, usability and safety for themselves and people in their care. To understand patient needs, questions will be asked about how each model would work, with participants thinking about their own care, as well as the safety and risks, For providers, we will ask them about barriers and enablers from their own and their patients’ perspectives, for each model of care, and their anticipated needs when providing care in the new hospital. At the end of each workshop, the participants will be asked to indicate their preferred model of care via a poll. Example facilitator scripts for the consumer and provider groups are provided in Supplementary File 2.

Each workshop will be planned for a two-hour duration with a five-minute break after the first hour. Each participant will be invited to participate in one workshop but will be offered a series of dates to choose from. Participants will not be paid for their participation but those who attend in person will be provided with refreshments.

#### *Participants:*

The consumer workshops will include residents of the new health facility catchment area. Provider workshops will comprise health providers that provide care or are likely to provide care and stakeholders who make decisions about the provision of care such as LHD executives and administrators, for the catchment population. In the first wave of data collection, we will recruit 15-30 participants for each of the workshops (this estimation takes into consideration participant loss to follow-up). Six workshops will result in approximately 120 health providers and 120 consumer member participants (240 participants in total).

1  
2  
3 However, the number of participants invited to each workshop may be influenced by  
4  
5 government-mandated COVID-19 restrictions at the time of data collection. In a second  
6  
7 wave, up to 40, non-English speaking, CALD participants will be recruited with the support  
8  
9 of the LHD's Multicultural Health Team.

10  
11  
12 In parallel, there will be a third, but separate but aligned, a wave of data collection, to include  
13  
14 consultation with Aboriginal and Torres Strait Islander Elders. Consultation with these  
15  
16 community members will involve a formal process of consultation with Aboriginal Liaison  
17  
18 Officers in the LHD to develop an Aboriginal Health Impact Statement and associated ethics  
19  
20 proposal. This consultation will be conducted in person to ensure this is delivered in a  
21  
22 culturally respectful manner as directed by the Aboriginal Liaison Officers in the LHD.  
23  
24

25  
26 *Inclusion criteria:*

27  
28 All participants will be 18 or older and will either have English language competence  
29  
30 (written and spoken) or interpreter-assisted non-English language (written and spoken),  
31  
32 sufficient to provide verbal informed consent. The study is open to all community members,  
33  
34 but we will also specifically seek to recruit participants representative of the six specific  
35  
36 health conditions/services by targeting the recruitment of condition networks associated with  
37  
38 these health conditions.  
39  
40

41  
42 Those who currently provide care to those residing in the catchment for the new health  
43  
44 facility, or who make decisions about the provision of care for those residing in the  
45  
46 catchment, are eligible to participate. This will include general practitioners and other health  
47  
48 providers such as community nurses and services, allied healthcare professionals, aged care  
49  
50 facilities, community care organisations, the primary health network, community care  
51  
52 providers, the ambulance service, and other identified stakeholders. The inclusion criteria are  
53  
54 broad enough to capture any health provider in the LHD or new health facility catchment, but  
55  
56  
57  
58  
59  
60

1  
2  
3 we will also target participants whose work relates to patients in the six specific listed  
4 conditions or services.  
5

6  
7  
8 *Interviews:*  
9

10 Supplementary to the workshop, we will invite those participants who are key stakeholders  
11 but were unable to participate in the workshop, or those who indicate interest during the  
12 workshops to participate in semi-structured interviews. The purpose of these interviews is to  
13 expand on areas of interest and verify the findings from the workshop data. The focus of the  
14 interviews will be driven by those who volunteer. For example, if a consumer has experience  
15 with a model (e.g., hospital in the home for renal dialysis) one-on-one interviews will allow  
16 us to probe further into the specific barriers and enablers of the model while maintaining  
17 participant privacy. Interviews will be audio-recorded and are expected to last approximately  
18 45 minutes. The interview script commences with “For Model X, can you please elaborate on  
19 what you think is meant by the strengths/barriers/enablers/safety issues...”, and is  
20 deliberately open-ended to allow the participant to freely express their views. The interview  
21 script is provided in Supplementary File 3.  
22  
23  
24  
25  
26  
27  
28  
29  
30  
31  
32  
33  
34  
35  
36

37  
38 *Data collection:*  
39

40 Participants’ demographic information (e.g., age, gender) and health-relevant data will be  
41 collected through the EOI questionnaire. Consumers will be asked about their experiences  
42 using acute, chronic and outpatient services, their ethnicity, language spoken at home, and  
43 residential postcode. Consumers will be allocated a workshop group based on their  
44 experiences with healthcare services. Where possible, consumers with common experiences  
45 (e.g., chronic conditions) will be allocated to the same group. Additionally, CALD  
46 participants will be allocated to a group and presented with models which are perceived to be  
47 of increased relevance for this population (e.g. virtual care, digital hospital). Aboriginal and  
48 Torres Strait Islander peoples will be presented with all six models. Providers will be asked to  
49  
50  
51  
52  
53  
54  
55  
56  
57  
58  
59  
60

1  
2  
3 indicate their role, clinical specialty, whether they are employed by the LHD, and work  
4  
5 postcode. Where possible, providers with similar roles (e.g., nurses, general practitioners)  
6  
7 will be allocated to the same group. In the case of workshops being delivered online,  
8  
9 participants will be sent their information and consent forms to sign before attending.

10  
11  
12 The workshops and supplementary interviews will be run by a team of experienced health  
13  
14 services researchers and will explore the experiences and views of participants concerning  
15  
16 innovative models of care. Responses will be audio recorded. Key themes and different  
17  
18 points of view will be identified and recorded for qualitative analysis. Each group within a  
19  
20 workshop will provide their written notes and observations to the workshop facilitator who  
21  
22 will collate the data. The data will then be aggregated across all the workshops for analysis,  
23  
24 separately for consumers and providers.  
25  
26

27  
28 *Planned data analyses:*  
29

30  
31 The quantitative data that includes demographic and health-related data from the EOI  
32  
33 questionnaire will be analysed using SPSS V.22.0[26] and weighted against the Australian  
34  
35 Bureau of Statistics data for the catchment, to assess the representativeness of the sample.  
36

37  
38 Consumer and provider workshop and interview data for each model will be merged into two  
39  
40 aggregated, narrative summaries, one for consumers and one for providers. All participants  
41  
42 will be de-identified, and any identifiable features of the experiences or personal details  
43  
44 shared in the group will be changed (e.g., if a unique service or practitioner is mentioned; or  
45  
46 features of the disease that identifies the patient). Data collected in the workshops and  
47  
48 interviews will only be used for this research project. Aggregated data sets will be analysed  
49  
50 separately for consumers and providers.  
51  
52

53  
54 Qualitative data (i.e., facilitator notes and key elements of the workshop recordings) will be  
55  
56 thematically analysed independently using an open coding process by two members of the  
57  
58 research team, who will work together to resolve discrepancies. Themes will be extracted that  
59  
60

1  
2  
3 characterise the expectations and needs of the consumers and health providers in terms of the  
4 new health facility catchment. Any variation in response, or conflicting views, will be  
5 reported. Data collection and analysis will occur iteratively; questions used for workshops  
6 and guides for observations will be refined and expanded as new findings emerge.  
7  
8  
9

### 10 11 12 *Synthesising and integrating results:*

13  
14 Data will be synthesised using a triangulated approach, whereby literature review findings,  
15 community characteristics, and findings from the focus groups and interviews will be  
16 integrated to arrive at a set of evidence-based, community-and-provider-supported strategies  
17 for delivering care to those in the healthcare catchment. Figure 3 illustrates the data  
18 collection, analysis and synthesis strategy for the project. Triangulated findings will be used  
19 to inform planning options and the feasibility of implementation of the options for the  
20 development of the new health facility.  
21  
22  
23  
24  
25  
26  
27  
28  
29  
30

31  
32  
33 INSERT FIGURE 3 HERE  
34  
35

### 36 37 *Patient and Public Involvement*

38  
39 No patient was involved. No patient data is reported in this paper.  
40  
41  
42  
43

## 44 **Discussion**

45  
46 This study seeks to examine consumer and provider needs and expectations for the  
47 development of an innovative care model for a health facility, specifically about six evidence-  
48 based models of care, and the consumer-focused care that underpins them, and the health  
49 conditions that form major burdens of disease found in a diverse catchment area in  
50 metropolitan NSW, Australia. The study investigates community perspectives on each model  
51 of care in detail, each presented within a purpose-designed, contextualised health scenario.  
52  
53  
54  
55  
56  
57  
58  
59  
60 Healthcare delivery is changing due to the introduction of new and enhanced technologies,

1  
2  
3 the increasing social and economic burdens of ageing populations, and the prevalence of  
4 chronic disease, amongst other factors. Therefore, it is important that we use these findings to  
5 guide the development of new healthcare facilities to ensure that both consumer and provider  
6 needs are met. These findings may be used to inform policies on how to design new  
7 healthcare facilities in consideration of consumer and provider needs.  
8  
9

10  
11 The limitations of this study may include the following factors: due to the scope of the  
12 project, we cannot include an exhaustive list of health conditions. We have used a data-driven  
13 approach to stratify the main diseases reported in the new catchment as defined by the LHD.  
14 In addition, this study is limited to the local health district under investigation and the specific  
15 needs of the consumer and providers in that district and the catchment area could change as  
16 the LHD redefines its boundaries. Finally, low rates of participant enrolment is a potential  
17 limitation. To address this, we have ensured that our recruitment strategy is designed so that  
18 the study is advertised widely across several different mediums, and locations to increase the  
19 likelihood of snowballing. In the case of low recruitment numbers, we will readvertise the  
20 study.  
21  
22  
23  
24  
25  
26  
27  
28  
29  
30  
31  
32  
33  
34  
35  
36

### 37 **Expected outcomes**

38  
39 Adopting an evidence-based approach, we will elicit opinions from consumers and providers  
40 within the catchment of a new healthcare facility about the barriers and enablers associated  
41 with consumer-focused care and six innovative care models. Findings will be available to  
42 provide guidance in designing care models for future health facility development, in Australia  
43 and globally. Ultimately, the outcomes will help to ease the burdens that many health  
44 facilities face such as the increasing social and economic burdens of ageing populations, and  
45 the prevalence of chronic disease.  
46  
47  
48  
49  
50  
51  
52  
53  
54  
55  
56  
57  
58  
59  
60



1  
2  
3 **Ethics and Dissemination:** There are no known health or safety risks associated with  
4 participation in any aspect of the described study. Ethics approval for conducting the study  
5 was obtained from the Local Health District Human Research Ethics Committee  
6 (2021/PID01000). The results will be actively disseminated through peer-reviewed journals,  
7 conference presentations and reports to stakeholders.  
8  
9

10 **Contributors:** GL, JB, RCW and PH conceptualised the study. AC, NR, CP, ZM, RCW, PH,  
11 KM, RM, YZ, JL, FR, GA and JB contributed to the design of the study. AC drafted the  
12 initial manuscript, assisted by NR, CP, ZM, RCW, PH and JB. All authors contributed to the  
13 refinement of the paper and approved the final manuscript.  
14

15 **Acknowledgements:** The authors wish to thank Natasia Seo, Anita Calderan and Chrissan  
16 Segaram for their advice, and assistance in obtaining the demographic data for the health  
17 facility catchment area. The authors also wish to thank Monika Latanik and the Local Health  
18 District's Multicultural Unit for assisting with the planning for CALD recruitment and  
19 interpretation services.  
20  
21

22 **Data availability statement:** No additional data available.  
23

24 **Funding:** The study was funded by Health Infrastructure (NSW, Australia), as an  
25 independent consultancy to support a larger project developing and implementing a new  
26 health facility in Sydney, Australia. Grant number HI20314. The funder did not play a part in  
27 the design, conduct or reporting of this study.  
28  
29

30 **Competing interests:** Nil to declare  
31

32 **Disclaimer:** The views expressed herein are the personal views of the authors and not  
33 necessarily those of Western Sydney Local Health District, Health Infrastructure, or the NSW  
34 Ministry of Health, and are not to be understood or quoted as being made on behalf of or  
35 reflecting the positions of those organisations.  
36  
37  
38  
39  
40  
41  
42  
43  
44  
45  
46  
47  
48  
49  
50  
51  
52  
53  
54  
55  
56  
57  
58  
59  
60

1  
2  
3 **Patient consent for publication:** Participants will provide written consent in accordance  
4 with the HREC-approved Patient Information and Consent Form, which detailed how the  
5 findings would be disseminated. No patient data is reported in this paper.  
6  
7

8  
9  
10 **Provenance and peer review:** Not previously submitted or under consideration elsewhere.  
11

12 **Exclusive License:** I, the Submitting Author has the right to grant and does grant on behalf  
13 of all authors of the Work (as defined in the below author licence), an exclusive licence  
14 and/or a non-exclusive licence for contributions from authors who are: i) UK Crown  
15 employees; ii) where BMJ has agreed a CC-BY licence shall apply, and/or iii) in accordance  
16 with the terms applicable for US Federal Government officers or employees acting as part of  
17 their official duties; on a worldwide, perpetual, irrevocable, royalty-free basis to BMJ  
18 Publishing Group Ltd (“BMJ”) its licensees and where the relevant Journal is co-owned by  
19 BMJ to the co-owners of the Journal, to publish the Work in BMJ Open and any other BMJ  
20 products and to exploit all rights, as set out in our [licence](#).  
21  
22  
23  
24  
25  
26  
27  
28  
29  
30  
31  
32  
33  
34

35 The Submitting Author accepts and understands that any supply made under these terms is  
36 made by BMJ to the Submitting Author unless you are acting as an employee on behalf of  
37 your employer or a postgraduate student of an affiliated institution that is paying any  
38 applicable article publishing charge (“APC”) for Open Access articles. Where the Submitting  
39 Author wishes to make the Work available on an Open Access basis (and intends to pay the  
40 relevant APC), the terms of reuse of such Open Access shall be governed by a Creative  
41 Commons licence – details of these licences and which [Creative Commons](#) licence will apply  
42 to this Work are set out in our licence referred to above.  
43  
44  
45  
46  
47  
48  
49  
50  
51  
52  
53  
54  
55

56 Figure 1: Data collection points over time for consumer and provider groups.  
57

58 Figure 2: Recruitment process map  
59  
60

Figure 3: Recruitment process and data plan for the project

## References

1. Braithwaite J, Mannion R, Matsuyama Y, Shekelle PG, Whittaker S, Al-Adawi S. Healthcare systems: future predictions for global care. Boca Raton, Florida: CRC Press; 2018.
2. Amalberti R, Nicklin W, Braithwaite J. Preparing national health systems to cope with the impending tsunami of ageing and its associated complexities: Towards more sustainable health care. *Int J Qual Health Care*. 2016;28(3):412-4.
3. Braithwaite J, Mannion R, Matsuyama Y, Shekelle PG, Whittaker S, Al-Adawi S, et al. The future of health systems to 2030: a roadmap for global progress and sustainability. *Int J Qual Health Care*. 2018;30(10):823-31.
4. Penno E, Gauld R. Change, Connectivity, and Challenge: Exploring the Role of Health Technology in Shaping Health Care for Aging Populations in Asia Pacific. *Health Syst Reform*. 2017;3(3):224-35.
5. Havas K, Douglas C, Bonner A. Meeting patients where they are: improving outcomes in early chronic kidney disease with tailored self-management support (the CKD-SMS study). *BMC Nephrol*. 2018;19(1):279.
6. Joseph A, Kirk Hamilton D. The Pebble Projects: coordinated evidence-based case studies. *Build Res Inf*. 2008;36(2):129-45.
7. Conley J, O'Brien CW, Leff BA, Bolen S, Zulman D. Alternative strategies to inpatient hospitalization for acute medical conditions: a systematic review. *JAMA Internal Medicine*. 2016;176(11):1693-702.



- 1  
2  
3 18. Naranjo A, Fernandez-Conde S, Ojeda S, Torres-Hernandez L, Hernandez-Carballo  
4 C, Bernardos I, et al. Preventing future fractures: effectiveness of an orthogeriatric fracture  
5 liaison service compared to an outpatient fracture liaison service and the standard  
6 management in patients with hip fracture. Arch Osteoporos. 2017;12(1):112.  
7  
8  
9  
10  
11  
12 19. Oliveira JAd, Cordeiro RG, Rocha RG, Guimarães TCF, Albuquerque DCd. Impact  
13 of telephone monitoring on patients with heart failure: a randomized clinical trial. ACTA  
14 Paul Enferm. 2017;30(4):333-42.  
15  
16  
17  
18  
19 20. Grant SJ, Marthick M, Lacey J. Establishing an integrative oncology service in the  
20 Australian healthcare setting - the Chris O'Brien Lifecare Hospital experience. Support Care  
21 Cancer. 2019;27(6):2069-76.  
22  
23  
24  
25  
26 21. Australian Bureau of Statistics: Australian Statistical Geography Standard (ASGS)  
27 2021.  
28  
29  
30  
31 <https://www.abs.gov.au/websitedbs/d3310114.nsf/home/australian+statistical+geography+sta>  
32 [ndard+\(asgs\)](https://www.abs.gov.au/websitedbs/d3310114.nsf/home/australian+statistical+geography+standard+(asgs)) accessed 1 May 2021.  
33  
34  
35 22. Australian Bureau of Statistics : 2016 Census.  
36  
37 <https://www.abs.gov.au/ausstats/abs@.nsf/Lookup/2916.0main+features252016> accessed 1  
38 May 2021 [Available from:  
39  
40  
41 <https://www.abs.gov.au/ausstats/abs@.nsf/Lookup/2916.0main+features252016>.  
42  
43  
44 23. Epidemiology and Health Analytics, Western Sydney Local Health District.  
45 Epidemiological Profile - Rouse Hill Catchment Area (RHCA) Residents. 2021. Sydney:  
46 Western Sydney Local Health District; 2021.  
47  
48  
49  
50  
51 24. Harris PA, Taylor R, Thielke R, Payne J, Gonzalez N, Conde JG. Research electronic  
52 data capture (REDCap)—a metadata-driven methodology and workflow process for  
53 providing translational research informatics support. J Biomed Inform. 2009;42(2):377-81.  
54  
55  
56  
57  
58 25. Bloor M. Focus groups in social research. London: UK: SAGE Publications; 2001.  
59  
60

- 1
  - 2
  - 3
  - 4
  - 5
  - 6
  - 7
  - 8
  - 9
  - 10
  - 11
  - 12
  - 13
  - 14
  - 15
  - 16
  - 17
  - 18
  - 19
  - 20
  - 21
  - 22
  - 23
  - 24
  - 25
  - 26
  - 27
  - 28
  - 29
  - 30
  - 31
  - 32
  - 33
  - 34
  - 35
  - 36
  - 37
  - 38
  - 39
  - 40
  - 41
  - 42
  - 43
  - 44
  - 45
  - 46
  - 47
  - 48
  - 49
  - 50
  - 51
  - 52
  - 53
  - 54
  - 55
  - 56
  - 57
  - 58
  - 59
  - 60
26. IMB C. IBM SPSS Statistics for Windows, Version 22.0. Armonk, NY: IBM Corp. 2013.

For peer review only

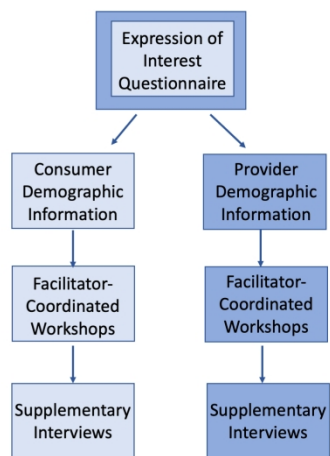

Figure 1: Data collection points over time for consumer and provider groups.

338x190mm (225 x 225 DPI)

1  
2  
3  
4  
5  
6  
7  
8  
9  
10  
11  
12  
13  
14  
15  
16  
17  
18  
19  
20  
21  
22  
23  
24  
25  
26  
27  
28  
29  
30  
31  
32  
33  
34  
35  
36  
37  
38  
39  
40  
41  
42  
43  
44  
45  
46  
47  
48  
49  
50  
51  
52  
53  
54  
55  
56  
57  
58  
59  
60

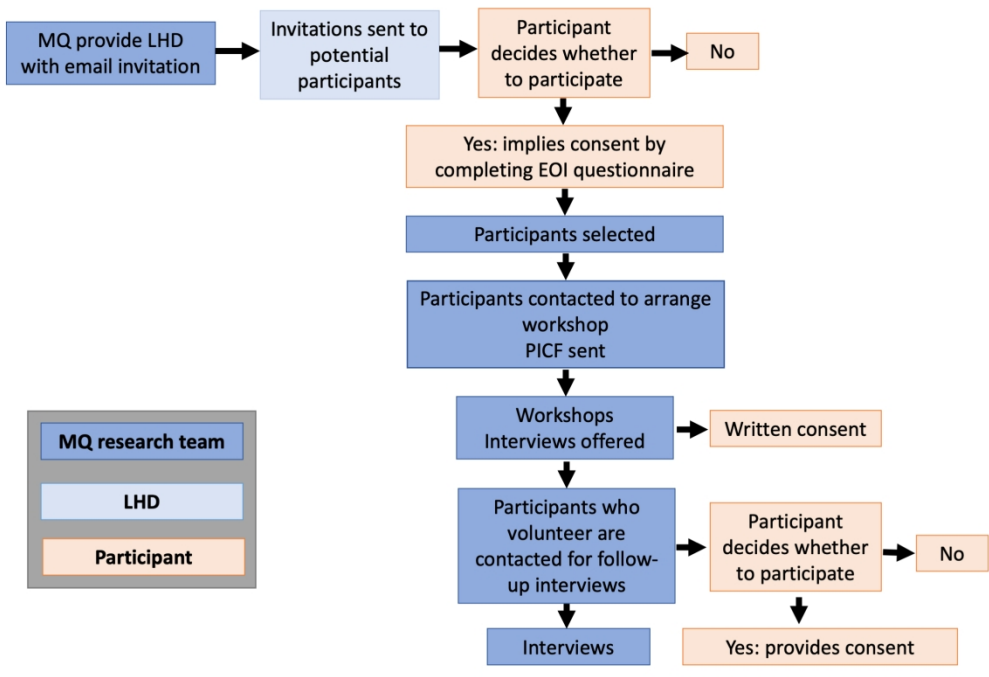

Recruitment process map  
260x178mm (225 x 225 DPI)





Figure 3: Recruitment process and data plan for the project

338x190mm (225 x 225 DPI)

Thank you for your interest in participating in our study. We want to hear from you and discuss ways that healthcare services could be delivered in and around the new Rouse Hill Hospital. The district includes **Annangrove, Acacia Gardens, Angus, Baulkham Hills, Beaumont Hills, Bella Vista, Box Hill, Carlingford, Castle Hill, Cattai, Colebee, Dural, Gables, Glenhaven, Glenorie, Glenwood, Grantham Farm, Kellyville, Kellyville Ridge, Kenthurst, Leets Vale, Lower Portland, Maraylya, Maroota, Marsden Park, Melonba, Middle Dural, Nelson, Nirimba Fields, North Kellyville, North Rocks, Norwest, Parklea, Quakers Hill, Richards, Riverstone, Rouse Hill, Sackville North, Schofields, Shanes Park, South Maroota, Stanhope Gardens, Tallawong, The Ponds, West Pennant Hills, Winston Hills, Wisemans Ferry, and Vineyard**. We will be holding a series of two-hour workshops in the local community with patients, consumers, community members and health care providers. To express interest in attending a workshop, please complete this short questionnaire about yourself. If you are unsure whether you would like to participate, you may wish to attend one of our information sessions first before you decide.

The research team will contact you to provide information about the workshop location and time. We will include a representative sample of the community and health care providers (e.g., we want people of different ages, background, professions, and healthcare needs), but we may not be able to include all of the people that apply. You will be informed either way if you have been invited to participate in the workshop or the other ways you can be involved in this important study.

### Questionnaire:

Please tick the boxes for all of the answers that apply to you within each question.

1. Are you interested in talking to us about how services will be delivered in and around the new Rouse Hill Hospital
  - Yes
  - Unsure, I would like more information. Please send me the details of the information sessions.
  - No I am not interested
  
2. Are you one of the following?:
  - I am a patient/ health consumer/ community member in the Western Sydney community
  - I am a carer/consumer representative in the Western Sydney community
  - I am a health provider in the Western Sydney community

[If selected "I am a health provider" to Q2]

What is your role? (Please tick all that apply)

- Administration/ Clerical
- Allied health professional/Allied health assistant
- Nursing (Registered nurse/Enrolled nurse/Assistant in nursing)
- Midwifery
- Medical (Consultant, Career Medical Officer, Registrar/JMO)
- General practitioner
- Community Pharmacist

## Expression of interest questionnaire

- 1       Property services/ Maintenance  
 2       Ancillary services: Catering, cleaning  
 3       Porter  
 4       Management  
 5               Team leader  
 6               Nursing Unit Manager  
 7               Head of Department  
 8               Director  
 9               Executive staff  
 10               
 11              Other (please specify)  
 12             .....  
 13  
 14  
 15

16  
 17 Postcode where you work:  
 18  
 19 .....

20  
 21 Are you employed by Western Sydney Local Health District (WSLHD)?  
 22

- 23       Yes  
 24       No  
 25       I would rather not say  
 26  
 27  
 28

29 Do you work in any specific clinical areas delivering services for people with the following  
 30 conditions (please tick all that apply):  
 31

- 32       Heart conditions  
 33       Bone injuries and conditions  
 34       Abdominal conditions  
 35       Lung conditions  
 36       Dialysis or kidney disease  
 37       Postnatal depression  
 38       Other illnesses  
 39  
 40  
 41  
 42

43 [if selected "I am a health consumer" to Q2]  
 44

- 45  
 46 3. As community members, your views on healthcare are valuable. We are interested in  
 47 your views on the way healthcare is delivered, whether you are affected by a specific  
 48 medical condition, or not. We have included a list of some conditions that may affect  
 49 you, however, we are interested in your perspectives even if none of the conditions  
 50 apply to you. Do any of these conditions or access to services outlined below personally  
 51 affect you (please tick all that apply):  
 52  
 53

- 54       Emergency Care: An injury or illness that required you to visit the Emergency  
 55 Department at hospital (e.g., heart attack or bone fracture)  
 56  
 57

58 Please select all that apply:

- 59       Heart conditions (e.g. cardiac arrest, chest pain, heart attack)  
 60       Bone injuries and conditions (e.g. fractures, knee and hip replacement)

## Expression of interest questionnaire

- Abdominal conditions (e.g. pelvic pain, abdominal pain, gastrointestinal pain)
- Lung conditions (e.g. pneumonia)
- Postnatal depression
- Other illnesses or experiences where you went to Emergency Care

- Chronic Care (non-emergency care): where you have a condition that lasts one year or more and requires ongoing medical attention or limits activities of daily living or both (e.g., renal disease or asthma).

Please select all that apply:

- Heart conditions (e.g. congestive heart failure)
- Dialysis or kidney disease (e.g. haemodialysis)
- Bone conditions (e.g. osteoporosis, abnormal gait etc.)
- Lung conditions (e.g. chronic obstructive pulmonary disease, asthma)
- Other illnesses or experiences (e.g., chronic post-natal depression)
- I am not affected by any chronic conditions

- Outpatient Clinics

Please select all that apply:

- Fracture
- Cardiac
- Diabetes
- Renal
- Other

[if selected "I am a carer" to Q2]

Are you a carer for someone who is affected by any of these conditions or access to services outlined below (please tick all that apply)?

- Emergency Care: An injury or illness that required the person you care for to visit the Emergency Department at hospital (e.g., heart attack or bone fracture)

Please select all that apply:

- Heart conditions (e.g. cardiac arrest, chest pain, heart attack)
- Bone injuries and conditions (e.g. fractures, knee and hip replacement)
- Abdominal conditions (e.g. pelvic pain, abdominal pain, gastrointestinal pain)
- Lung conditions (e.g. pneumonia)
- Postnatal depression
- Other illnesses or experiences where you went to Emergency Care

## Expression of interest questionnaire

- Chronic Care (non-emergency care): where the person you care for has a condition that lasts one year or more and requires ongoing medical attention or limits activities of daily living or both (e.g., renal disease or asthma).

Please select all that apply:

- Heart conditions (e.g. congestive heart failure)  
 Dialysis or kidney disease (e.g. haemodialysis)  
 Bone conditions (e.g. osteoporosis, abnormal gait etc.)  
 Lung conditions (e.g. chronic obstructive pulmonary disease, asthma)  
 Other illnesses or experiences  
 The person I care for is not affected by any chronic conditions

4. What is your age?

- Under 30y  
 31-45y  
 46-60y  
 61y+  
 Prefer not to answer

5. Gender: How do you identify?

- Male  
 Female  
 Other  
 Prefer not to answer

6. Postcode of where you live: (\_\_\_\_\_)

7. How would you rate your English language skills?

- Excellent  
 Good  
 Average  
 Not good

8. Do you speak a language other than English at home?

- Yes: Please select which one
- Punjabi
  - Hindi
  - Mandarin
  - Korean
  - Arabic
  - Cantonese
  - Dari
  - Greek
  - Italian
  - Maltese
  - Persian

## Expression of interest questionnaire

- 1                    Tamil  
2                    Tongan  
3                    Urdu  
4                    Other – please specify (\_\_\_\_\_)  
5  
6                    No  
7

8 9. With which ethnic group do you identify? (answer all that apply)

- 9                    Australian  
10                   Aboriginal or Torres Strait Islander  
11                   New Zealander  
12                   Asian  
13                   Indian  
14                   Middle Eastern  
15                   European  
16                   North American  
17                   South American  
18                   African  
19                   Other, please specify: (\_\_\_\_\_)

20 21 22 23 24 25 26 27 28 29 30 31 32 33 34 35 36 37 38 39 40 41 42 43 44 45 46 47 48 49 50 51 52 53 54 55 56 57 58 59 60

10. Are you happy to be contacted to attend a group discussion/workshop?

- Yes  
 No

[If no to Q10, then end survey]

11. What is your preferred contact method?

- Phone call  
 Email

12. The five main non-English languages spoken in the Rouse Hill district are Punjabi, Hindi, Mandarin, Korean and Arabic so we will offer workshops in these languages. If you would prefer to engage with a person who speaks your language to provide written and spoken information at a group discussion/workshop, please indicate below:

- Yes: I would like a bilingual interpreter available at a group discussion/workshop.

Please select which language:

- Punjabi  
 Hindi  
 Mandarin  
 Korean  
 Arabic

- No: I am happy to communicate in English (written and spoken).

13. Please leave your name and telephone number and/or email address so we can contact you.

1  
2  
3  
4  
5  
6  
7  
8  
9  
10  
11  
12  
13  
14  
15  
16  
17  
18  
19  
20  
21  
22  
23  
24  
25  
26  
27  
28  
29  
30  
31  
32  
33  
34  
35  
36  
37  
38  
39  
40  
41  
42  
43  
44  
45  
46  
47  
48  
49  
50  
51  
52  
53  
54  
55  
56  
57  
58  
59  
60

First name: .....

Surname: .....

Mobile: .....

Email Address.....

[Only display Q12 to participants who answered “No” to Q1]

14. If you are interested in the online information sessions, please leave your email address and we will send this information to you.

First name: .....

Surname: .....

Email Address.....

END OF SURVEY

### Consumer: General Welcome

“Thank you for coming along today and participating in our study. My name is XXX.

Acknowledgement of Country

Bathrooms, fire exits.

The purpose of this workshop is to capture the needs of the Rouse Hill community and their perspectives on new ways of delivering acute care. What we talk about today will inform the development of the new hospital in Rouse Hill. We really appreciate your time and thank you very much for being here today.

**Consumer stream:** As consumers of healthcare, your experiences as patients are very valuable. However, please note that there is no obligation to disclose details of personal healthcare issues.

Throughout the workshop a researcher/facilitator will be with each table group to take notes, facilitate discussion and ask you questions. The workshop will go for 2 hours with a 10-minute break with refreshments after the first hour.”

Audio-recording devices, flipcharts, and notes will be used to capture discussions. You will remain unidentifiable in the analysis and write-up of any findings relating to this research.

If you have any questions throughout the day, please ask one of the Macquarie University staff members (**introduce all staff members**).

Before we begin, we ask that you read and sign the PICF on your tables. If you have any questions before signing, now is the time to ask (**pause for questions**). Once you’ve signed, we will photocopy the documents and provide you with your own version.”

### Group Introduction

“Good afternoon (morning/evening etc.) and welcome to the workshop. Thanks for taking the time to talk with us about what you would like to see in the new Rouse Hill Hospital. My name is (**insert name here**), and I am from the Australian Institute of Health Innovation at Macquarie University. We are working in partnership with Health Infrastructure and the Western Sydney Local Health District. My role as moderator will be to guide the discussion today.



Please note that there are no right or wrong answers but rather differing points of view. Please feel free to share your point of view even if it differs from what others have said. You don't need to agree with others' opinions, but we ask that you listen respectfully as others share their views.

You've probably noticed the microphone. We are taping the session because we don't want to miss any of your comments. People often say very helpful things in these discussions, and we can't write fast enough to get them all down. However, to make the recording as clear as possible, we ask that only one person speak at a time. And to remind you, no-one is identifiable on the recording.

Let's get started! Before we begin, if you wouldn't mind writing your name on the (name card/sticker in front of you. We will be on a first name basis today, but we won't use any names in our reports."

### **Icebreaker Activity**

"To get everyone thinking, we have planned a brief icebreaker activity. The purpose of this activity is to encourage thinking outside of the box.

- As a group, let's try to come up with 15 different ways that you can use a paperclip. The more inventive, the better. Who would like to start? We have 3 minutes!

(Separate sheet of paper)

As some of the models of care involve understanding technological devices

Please rate on the scale below the following:

#### **1. How comfortable are you using:**

##### **A smart phone?**

Extremely Uncomfortable, Somewhat Uncomfortable, Neutral, Somewhat Comfortable, Extremely Comfortable

##### **A smart watch?**

Extremely Uncomfortable, Somewhat Uncomfortable, Neutral, Somewhat Comfortable, Extremely Comfortable

##### **Computers?**

Extremely Uncomfortable, Somewhat Uncomfortable, Neutral, Somewhat Comfortable, Extremely Comfortable

"Now that we have gotten to know each other a little better we would like you to reflect on a patient or patients who may or may not benefit from different "models of care". Today, we will talk about three different models of care in our workshop today. These are not the only models of care we are exploring, but we only have two hours, so will be talking about different models with

1  
2  
3 different groups. We are interested in your ideas and would like you to reflect broadly as well as on  
4 your experience as a person who may or may not benefit from these three different “models of  
5 care”.

6  
7  
8  
9 **Model 1: Ambulatory Care and diagnostic hospitals:** Non-admitted services, where patient care does  
10 not involve an overnight stay and usually involves diagnosis and treatment on the same day.

11  
12 SHOW images: Home vs. Hospital (Images 1/2)  
13 Maria (Image 3)

14  
15 Your name is Maria and you are a 45 year old patient who is able to walk unaided and travels to a  
16 centre for treatment 2-3 times per week (e.g., renal dialysis in a shopping centre, chemotherapy)

17  
18  
19  
20 **We would like to ask questions from Maria’s as well as your own perspective. Let’s start with**  
21 **Maria:**

22  
23 **From Maria’s perspective:**

- 24  
25  
26 **1. What is good about this model for Maria?**  
27  
28 **2. What about this model might make it difficult for Maria?**

29  
30  
31 *Additional prompts*

32 Can you think of anything about it that might be impractical?

33 Can you think of anything about it that might be unachievable?

- 34  
35  
36  
37 **3. What needs to be in place for this to work for Maria?**

38  
39  
40 **For example, systems, processes, people, skills and equipment?**

41 **Now from your perspective:**

- 42  
43  
44 **4. What about this model might be good for you and your family?**  
45  
46 **5. What about this model might make it difficult for you and your family?**

47  
48  
49 *Additional prompts*

50 Can you think of anything about it that might be impractical?

51 Can you think of anything about it that might be unachievable?

- 52  
53  
54  
55  
56 **6. How easy is this to use for you?**  
57  
58  
59 **7. What would stop you using it?**  
60

1  
2  
3  
4 **8. Can you think of other people who would have difficulty using this model?**

5  
6  
7 **9. We have already asked for Maria but what other things needs to be in place for this to**  
8 **work for you?**

9  
10 **For example systems, processes, people, skills and equipment**

11  
12  
13  
14  
15 **General questions:**

16  
17 **10. Is there anything about the model that concerns you?**

18  
19 **11. Can you see any safety issues for yourself?**

- 20  
21 ○ Why is that?
- 22  
23 ○ *Can you suggest a better way?*

24  
25  
26 *(Additional prompts)*

27 *Are there any potential risks that you can identify?*

28  
29 **12. What other illness and injuries might this model work for?**

30  
31  
32  
33 **Model 2: Digital Hospitals/Consumer Focused Care**

34  
35 Hospitals that make extensive use of new technologies to provide streamlined care, improve patient  
36 safety and care quality, and improve overall care cost effectiveness.

37  
38  
39 **SHOW images: Home vs. Hospital (Images 1/2)**

40 **John (Image 4)**

41  
42 John is an 70-year-old man who has a heart condition that causes dizziness (e.g., irregular  
43 heartbeat). As this places him at a high risk of falls, he has been admitted to hospital for monitoring.

44  
45 Beside his bed is a digital matt that detects and alerts the staff if he has had a fall.

46  
47  
48  
49 **Repeat questions**

50  
51  
52 **Model 3: Hospital in the Home**

53  
54 Patient care and consultation which is typically delivered in the hospital settings is delivered to  
55 patients in their own home (e.g., intravenous therapy (antibiotics), anticoagulation, wound care, and  
56 chemotherapy).

57  
58  
59 **SHOW images: Home vs. Hospital (Images 1/2)**

Jenny (Image 5)

Jenny is a 35-year-old, single mother of three who developed a breast infection with an abscess following the birth of her baby. She was treated with intravenous antibiotics (on a drip) and a tube was placed into her breast to drain the infected fluid. After 24 hours, she returned home to her children and is provided wound care and support in her home from a visiting nurse.

Repeat questions

### At end of focus group

**Concluding remarks:** Now that we have come to the end of the workshop, we'd like to ask you:

#### How important is it for you to be able to choose a model of care?

Prompt: What if you have no option to choose? (only use if needed)

**From your perspective, please rate your preference for each model:** (Note: Models X, Y, and Z will be replaced with the relevant models discussed at each workshop).

|         |         |                  |         |
|---------|---------|------------------|---------|
| Model X | No pref | Neither suitable | Model Y |
| Model Y | No pref | Neither suitable | Model Z |
| Model Z | No pref | Neither suitable | Model X |

Is there anything else you would like to communicate to us about the new hospital?

### Concluding remarks:

We will be looking at your data to find commonalties between consumers.

We are conducting exploratory research to gather information only, and all models may not be implemented. Thank you for your time.

**Note: All images were publicly available and downloaded from Google.**

### Provider: General Welcome

“Thank you for coming along today and participating in our study. My name is XXX.

Acknowledgement of Country

Bathrooms, fire exits.

The purpose of this workshop is to capture the needs of the Rouse Hill community and their perspectives on new ways of delivering acute care. What we talk about today will inform the development of the new hospital in Rouse Hill. We really appreciate your time and thank you very much for being here today.

As providers of healthcare, your experiences as patients are very valuable. However, please note that there is no obligation to disclose details of personal healthcare issues.

Throughout the workshop a researcher/facilitator will be with each table group to take notes, facilitate discussion and ask you questions. The workshop will go for 2 hours with a 10-minute break with refreshments after the first hour.

Audio-recording devices, flipcharts, and notes will be used to capture discussions. You will remain unidentifiable in the analysis and write-up of any findings relating to this research.

If you have any questions throughout the day, please ask one of the Macquarie University staff members (**introduce all staff members**).

Before we begin, we ask that you read and sign the PICF on your tables. If you have any questions before signing, now is the time to ask (**pause for questions**). Once you’ve signed, we will photocopy the documents and provide you with your own version.”

### Individual Group Introduction

“Good afternoon (morning/evening etc.) and welcome to the workshop. Thanks for taking the time to talk with us about what you would like to see in the new Rouse Hill Hospital. My name is (**insert name here**), and I am from the Australian Institute of Health Innovation at Macquarie University. We are working in partnership with Health Infrastructure and the Western Sydney Local Health District. My role as moderator will be to guide the discussion today.

Please note that there are no right or wrong answers but rather differing points of view. Please feel free to share your point of view even if it differs from what others have said. You don't need to agree with others' opinions, but we ask that you listen respectfully as others share their views.

You've probably noticed the microphone. We are taping the session because we don't want to miss any of your comments. People often say very helpful things in these discussions, and we can't write fast enough to get them all down. However, to make the recording as clear as possible, we ask that only one person speak at a time. And to remind you, no-one is identifiable on the recording.

Let's get started! Before we begin, if you wouldn't mind writing your name on the (name card/sticker in front of you. We will be on a first name basis today, but we won't use any names in our reports."

(Separate sheet of paper)

As some of the models of care involve understanding technological devices

Please rate on the scale below the following:

**2. How comfortable are you using:**

**A smart phone?**

Extremely Uncomfortable, Somewhat Uncomfortable, Neutral, Somewhat Comfortable, Extremely Comfortable

**A smart watch?**

Extremely Uncomfortable, Somewhat Uncomfortable, Neutral, Somewhat Comfortable, Extremely Comfortable

**Computers?**

Extremely Uncomfortable, Somewhat Uncomfortable, Neutral, Somewhat Comfortable, Extremely Comfortable

**3. What proportion of your patients would be comfortable using:**

**A smart phone?**

Extremely Uncomfortable, Somewhat Uncomfortable, Neutral, Somewhat Comfortable, Extremely Comfortable

**A smart watch?**

Extremely Uncomfortable, Somewhat Uncomfortable, Neutral, Somewhat Comfortable, Extremely Comfortable

**Computers?**

Extremely Uncomfortable, Somewhat Uncomfortable, Neutral, Somewhat Comfortable, Extremely Comfortable

4. **So that we can understand you a bit better, what is your discipline?**
5. **Are you mostly:**  
Office based, facility based, a combination of both?
6. **What main problems do you currently encounter around delivering high quality care?**
7. **Can you suggest ways to overcome? (5 minutes)**
8. **What are you looking for in a new hospital?**  
For example: IT/Scheduling/Accessibility

“Now that we have gotten to know each other a little better we would like you to reflect on a patient or patients who may or may not benefit from different “models of care”. Today, we will talk about three different models of care in our workshop today. These are not the only models of care we are exploring, but we only have two hours, so will be talking about different models with different groups. We are interested in your thoughts about each of these models of care from your perspective and your patients’ perspective. Some of these scenarios describe models you may have already encountered or engaged with. We would like you to think broadly.”

**Model 1: Ambulatory Care** and diagnostic hospitals/ **Consumer Focused Care**

Non-admitted services, where patient care does not involve an overnight stay and usually involves diagnosis and treatment on the same day.

Maria is a 65 year old patient who is ambulant and travels to a facility for routine care 2-3 times per week (e.g., renal dialysis, chemotherapy)

Please answer the following questions:

1. **In an ideal world, how would her care be delivered?**

*Additional prompt:* how could you best model this?

**From your perspective:**

2. **How would this model help to solve the big problems for you?**  
**(What are the pros/strengths for you?)**
3. **What barriers limit this model for you?**
4. **What enablers would need to be in place for this to work?**

1  
2  
3  
4 **From your patients' perspective:**  
5

6 **5. How would this model help to solve the big problems for your patients?**  
7

8 **6. What might be the pros/strengths?**  
9

10 **7. What barriers might limit this model for your patients?**  
11

12 **8. What enablers would need to be in place for this to work?**  
13  
14  
15

16  
17 **General questions:**  
18

19 **9. What proportion of your patients would this model work for?**  
20

21 Low – Mid – High  
22

23 **10. Can you think of anything about it that might be impractical?**  
24

25 **11. Can you think of anything about it that might be unachievable?**  
26

27 **12. To what extent could this model be applicable to other health conditions? What**  
28 **conditions?**  
29

30 **13. Can you think of any clinicians or patients who might find this model of care difficult to**  
31 **access?**  
32

33 **14. Is there anything about the model that concerns you?**  
34

35 **15. What might be the safety issues for your patients?**  
36  
37

38 **16. Do you see any risks to you as the healthcare provider?**  
39  
40  
41

42  
43  
44  
45  
46  
47  
48  
49  
50  
51  
52 *(Additional prompts)*

53 *Are there any potential risks that you can identify?*

- 54  *"Why is that?"*  
55  
56  *Can you suggest a better way?*  
57  
58  
59  
60



**Model 2: Digital Hospitals/Consumer Focused Care**

Hospitals that make extensive use of new technologies to provide streamlined care, improve patient safety and care quality, and improve overall care cost effectiveness.

You are in a place you usually work at, and the facility has digital technology in place such as intravenous fluid charts, bed sensors to alert staff that a patient needs moving in bed, floor mats that alert staff when patients are out of bed, and interactive monitors for patients and staff about daily schedules.

Repeat questions

**Model 3: Hospital in the Home**

Patient care and consultation which is typically delivered in the hospital settings is delivered to patients in their own home (e.g., intravenous therapy (antibiotics), anticoagulation, wound care, and chemotherapy).

Your patient has undergone a procedure or surgery and after treatment in the hospital is discharged home for follow-up care. For example: Jenny is a 35-year-old, single mother of three who developed complicated mastitis with an abscess following the birth of her baby. She was treated with intravenous antibiotics and a drain was placed into the abscess. After 24 hours, she returned home to her children and is provided wound care and support from a nurse.

Repeat questions

**At end of focus group**

**Thinking broadly, from your perspective, please rate your preference for each model:** (Note: Models X, Y, and Z will be replaced with the relevant models discussed at each workshop).

|         |         |                  |         |
|---------|---------|------------------|---------|
| Model X | No pref | Neither suitable | Model Y |
| Model Y | No pref | Neither suitable | Model Z |
| Model Z | No pref | Neither suitable | Model X |

1  
2  
3 **Thinking broadly, from your patients' perspective, please rate your preference for each model:**

4  
5 (Note: Models X, Y, and Z will be replaced with the relevant models discussed at each workshop).

6  
7

|            |            |                     |            |
|------------|------------|---------------------|------------|
| 8 Model X  | 9 No pref  | 10 Neither suitable | 11 Model Y |
| 12 Model Y | 13 No pref | 14 Neither suitable | 15 Model Z |
| 16 Model Z | 17 No pref | 18 Neither suitable | 19 Model X |

20  
21  
22  
23  
24  
25  
26  
27  
28  
29  
30  
31  
32  
33  
34  
35  
36  
37  
38  
39  
40  
41  
42  
43  
44  
45  
46  
47  
48  
49  
50  
51  
52  
53  
54  
55  
56  
57  
58  
59  
60

**Concluding remarks:**

We will be looking at your data to find commonalties between providers.

We are conducting exploratory research to gather information only, and all models may not be implemented. Thank you for your time.

1  
2  
3  
4  
5  
6  
7  
8  
9  
10  
11  
12  
13  
14  
15  
16  
17  
18  
19  
20  
21  
22  
23  
24  
25  
26  
27  
28  
29  
30  
31  
32  
33  
34  
35  
36  
37  
38  
39  
40  
41  
42  
43  
44  
45  
46  
47  
48  
49  
50  
51  
52  
53  
54  
55  
56  
57  
58  
59  
60

For peer review only

1  
2 Thank you for agreeing to allow us to contact you for a follow up call to talk about the  
3 findings of the discussions. The purpose of this phone call is to expand on areas of interest  
4 and verify the findings from the workshop data. What we talk about today will continue to  
5 inform the development of the new hospital in Rouse Hill. The discussion will be recorded so  
6 we can capture everything that is said.  
7  
8

9 You are free to withdraw at any time without consequence.  
10

11 Do you have any questions before we start? (pause for questions).  
12

13 For Model X, Y, Z , can you please elaborate on what you think is meant by....  
14

15  
16 For Model X, Y, Z, can you please elaborate on what you think is meant by....  
17  
18  
19  
20  
21  
22  
23  
24  
25  
26  
27  
28  
29  
30  
31  
32  
33  
34  
35  
36  
37  
38  
39  
40  
41  
42  
43  
44  
45  
46  
47  
48  
49  
50  
51  
52  
53  
54  
55  
56  
57  
58  
59  
60
