# Supplementary material for: Innovative models of care for the health facility of the future: a protocol for a mixed-methods study to elicit consumer and provider views
Source: PubMed Central journal article supplement — BMJ Open. 2022 Nov 15;12(11):e059330. doi: 10.1136/bmjopen-2021-059330 (PMC9670088; doi:10.1136/bmjopen-2021-059330), 2022-11-15
Supplement: bmjopen-2021-059330supp003.pdf [file bmjopen-2021-059330supp003.pdf]

## Interview script

Thank you for agreeing to allow us to contact you for a follow up call to talk about the findings of the discussions. The purpose of this phone call is to expand on areas of interest and verify the findings from the workshop data. What we talk about today will continue to inform the development of the new hospital in Rouse Hill. The discussion will be recorded so we can capture everything that is said.

You are free to withdraw at any time without consequence.

Do you have any questions before we start? (pause for questions).

For Model X, Y, Z , can you please elaborate on what you think is meant by....

For Model X, Y, Z, can you please elaborate on what you think is meant by....
